# Supplementary material for: On the Bioactivity of Echinacea purpurea Extracts to Modulate the Production of Inflammatory Mediators
Source: MDPI journal article supplement (doi:10.3390/ijms232113616), 2022-11-06
Supplement: s1 [file s1]

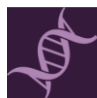

Supplementary Material

# On the Bioactivity of *Echinacea purpurea* Extracts to Modulate the Production of Inflammatory Mediators

Sara F. Vieira <sup>1,2</sup>, Virgínia M. F. Gonçalves <sup>3,4</sup>, Carmen P. Llaguno <sup>5</sup>, Felipe Macías <sup>5</sup>, Maria Elizabeth Tiritan <sup>3,6,7</sup>, Rui L. Reis <sup>1,2</sup>, Helena Ferreira <sup>1,2,\*</sup> and Nuno M. Neves <sup>1,2,\*</sup>

- <sup>1</sup> 3B's Research Group, I3Bs—Research Institute on Biomaterials, Biodegradables and Biomimetics, University of Minho, Headquarters of the European Institute of Excellence on Tissue Engineering and Regenerative Medicine, AvePark, Parque de Ciência e Tecnologia, Zona Industrial da Gandra, Barco, 4805-017 Guimarães, Portugal
  - <sup>2</sup> ICVS/3B's—PT Government Associate Laboratory, 4710-057 Braga/Guimarães, Portugal
  - <sup>3</sup> TOXRUN—Toxicology Research Unit, University Institute of Health Sciences (IUCS), CESPU, CRL, 4585-116 Gandra, Portugal
  - <sup>4</sup> UNIPRO—Oral Pathology and Rehabilitation Research Unit, University Institute of Health Sciences (IUCS), CESPU, CRL, 4585-116 Gandra, Portugal
  - <sup>5</sup> Departamento de Edafología e Química Agrícola, Facultad de Biología, Universidad de Santiago de Compostela, 15782 Santiago de Compostela, Spain
  - <sup>6</sup> Interdisciplinary Centre of Marine and Environmental Research (CIIMAR), University of Porto, Terminal de Cruzeiros do Porto de Leixões, Avenida General Norton de Matos, S/N, 4450-208 Matosinhos, Portugal
  - <sup>7</sup> Laboratório de Química Orgânica e Farmacêutica, Departamento de Ciências Químicas, Faculdade de Farmácia da Universidade do Porto, Rua Jorge de Viterbo Ferreira 228, 4050-313 Porto, Portugal
- \* Correspondence: helenaferrera@i3bs.uminho.pt (H.F.); nuno@i3bs.uminho.pt (N.M.N.); Tel.: +351-253-510-913 (H.F.); +351-253-510-905 (N.M.N.); Fax: +351-253-510-909 (H.F. & N.M.N.)

**Citation:** Vieira, S.F.; Gonçalves, V.M.F.; Llaguno, C.P.; Macías, F.; Tiritan, M.E.; Reis, R.L.; Ferreira, H.; Neves, N.M. On the Bioactivity of *Echinacea purpurea* Extracts to Modulate the Production of Inflammatory Mediators. *Int. J. Mol. Sci.* **2022**, *23*, 13616. <https://doi.org/10.3390/ijms232113616>

Academic Editor: Massimiliano Gasparrini

Received: 13 September 2022

Accepted: 4 November 2022

Published: 6 November 2022

**Publisher's Note:** MDPI stays neutral with regard to jurisdictional claims in published maps and institutional affiliations.

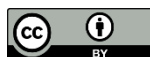

**Copyright:** © 2022 by the authors. Licensee MDPI, Basel, Switzerland. This article is an open access article distributed under the terms and conditions of the Creative Commons Attribution (CC BY) license (<https://creativecommons.org/licenses/by/4.0/>).

**Table S1.** Characterization of caftaric acid, chlorogenic acid, caffeic acid, cynarin, echinacoside, chicoric acid, undeca-2E/Z-ene-8,10-diynoic acid isobutylamide, dodeca-2E-ene-8,10-diynoic acid isobutylamide, dodeca-2E,4E-dienoic acid isobutylamide, and dodeca-2E,4E,8Z,10E/Z-tetraenoic acid isobutylamide by LC-HRMS.

| Standard compound | Chemical structure                                                                  | Formula              | Exact mass   | Theoretical precursor ion (m/z) | Precursor ion (m/z)            | $t_R$ (min) | Product ions (m/z)                                                                                                                                                     |
|-------------------|-------------------------------------------------------------------------------------|----------------------|--------------|---------------------------------|--------------------------------|-------------|------------------------------------------------------------------------------------------------------------------------------------------------------------------------|
| Phenols/acids     |                                                                                     |                      |              |                                 |                                |             |                                                                                                                                                                        |
| Caftaric acid     | 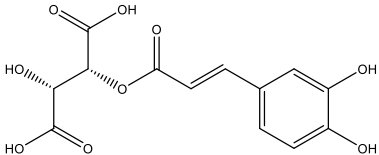   | $C_{13}H_{12}O_9$    | 312.04813196 | 311.0403                        | 311.0417<br>[M-H] <sup>-</sup> | 4.8         | 179.0361 (100), 149.0100 (63), 135.0458 (35)                                                                                                                           |
| Chlorogenic acid  |    | $C_{16}H_{18}O_9$    | 354.09508215 | 353.0873                        | 353.0880<br>[M-H] <sup>-</sup> | 6.4         | 191.0565 (100), 192.0599 (11), 353.0859 (5),<br>161.0240 (2), 179.0348 (1)                                                                                             |
| Caffeic acid      |   | $C_9H_8O_4$          | 180.04225873 | 179.0345                        | 179.0352<br>[M-H] <sup>-</sup> | 7.3         | 135.0453 (100), 179.0354 (25), 136.0487 (13), 134.0372(9), 180.0384 (5), 107.0510 (2)                                                                                  |
| Cynarin           |  | $C_{25}H_{24}O_{12}$ | 516.12677620 | 515.1190                        | 515.1181<br>[M-H] <sup>-</sup> | 8.6         | 353.0871 (100), 191.0561 (54), 179.0350 (53), 515.1170 (41), 354.0903 (20),<br>335.0753 (17), 516.1212 (10), 135.0452 (5),<br>161.0252 (5), 192.0598 (5), 173.0441 (5) |

|                                                     |                                                                                     |                      |              |          |                                |      |                                                                                                                                          |
|-----------------------------------------------------|-------------------------------------------------------------------------------------|----------------------|--------------|----------|--------------------------------|------|------------------------------------------------------------------------------------------------------------------------------------------|
| Echinacoside                                        | 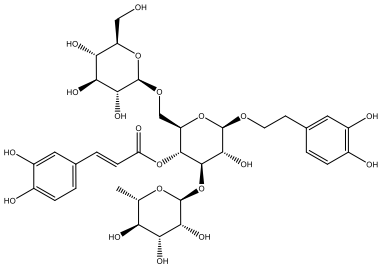   | $C_{35}H_{46}O_{20}$ | 786.25824385 | 785.2504 | 785.2493<br>[M-H] <sup>-</sup> | 9.3  | 785.2508 (100), 786.2537 (38), 161.0246 (22), 623.2174 (22), 787.2566 (11), 624.2247 (8), 132.0218 (1), 135.0458 (1)                     |
| Chicoric acid                                       |    | $C_{22}H_{18}O_{12}$ | 474.07982601 | 473.0720 | 473.0717<br>[M-H] <sup>-</sup> | 10.6 | 149.0091 (100), 179.0343 (84), 311.0396 (64), 293.0295 (22), 135.0448 (8), 112.9864 (6)                                                  |
| Alkylamides                                         |                                                                                     |                      |              |          |                                |      |                                                                                                                                          |
| Undeca-2E/Z-ene-8,10-diynoic acid isobutylamide     |   | $C_{15}H_{21}NO$     | 231.16231    | 232.1701 | 232.1698<br>[M+H] <sup>+</sup> | 20.4 | 57.0696 (100), 91.0541 (84), 79.0538 (46), 41.0382 (45), 65.0383 (32), 105.0698 (31), 115.0537 (23), 176.1068 (3)                        |
| Dodeca-2E-ene-8,10-diynoic acid isobutylamide       |  | $C_{16}H_{23}NO$     | 245.17796    | 246.1858 | 246.1855<br>[M+H] <sup>+</sup> | 20.8 | 57.0696 (100), 79.0536 (57), 91.0541 (39), 41.0381 (31), 105.0698 (28), 67.0537 (26), 77.038 (21), 81.0693 (20)                          |
| Dodeca-2E,4E,8Z,10E/Z-tetraenoic acid isobutylamide |  | $C_{16}H_{25}NO$     | 247.19361    | 248.2014 | 248.2014<br>[M+H] <sup>+</sup> | 21.2 | 57.0695 (100), 67.054 (44), 68.062 (34), 81.0692 (12), 41.0382 (12), 152.1065 (11), 79.0541 (9), 66.0463 (9), 167.1297 (4), 100.0763 (3) |

|                                         |                                                                                   |                                    |           |          |                                |      |                                                                                                                        |
|-----------------------------------------|-----------------------------------------------------------------------------------|------------------------------------|-----------|----------|--------------------------------|------|------------------------------------------------------------------------------------------------------------------------|
| Dodeca-2E,4E-dienoic acid isobutylamide | 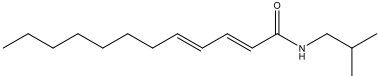 | C <sub>16</sub> H <sub>29</sub> NO | 251.22491 | 252.2327 | 252.2317<br>[M+H] <sup>+</sup> | 21.9 | 57.0695 (100), 55.0538 (77), 81.0328 (52),<br>67.0539 (47), 69.0697 (45), 81.0691 (37),<br>95.0851 (22), 196.1692 (10) |
|-----------------------------------------|-----------------------------------------------------------------------------------|------------------------------------|-----------|----------|--------------------------------|------|------------------------------------------------------------------------------------------------------------------------|

**Table S2.** Phenolic/acid compounds tentatively identified in *E. purpurea* extracts by LC-HRMS (negative mode). F: flowers; L: leaves; R: roots; AE: aqueous extracts; EE: ethanolic extracts; DE: dichloromethanolic extracts.

| Proposed phenolic/acid compound               | Precursor ion<br>[M – H] <sup>–</sup> (m/z) | t <sub>R</sub><br>(min) | Product ions (m/z) <sup>1</sup>                                                                                  |
|-----------------------------------------------|---------------------------------------------|-------------------------|------------------------------------------------------------------------------------------------------------------|
| <b>Aqueous Extracts obtained from Flowers</b> |                                             |                         |                                                                                                                  |
| Malic acid                                    | 133.0154                                    | 1.4                     | 115.0040 (100), 71.0141 (72), 133.0149 (69), 72.9931 (27), 89.0241 (19), 43.0195 (7)                             |
| Vanillic acid                                 | 167.0357                                    | 3.6                     | 152.0131 (100), 167.0350 (84), 123.0467 (36), 108.0241 (28)                                                      |
| Protocatechuic acid                           | 153.0197                                    | 4.2                     | 109.0298 (100), 153.0207 (26), 110.0322 (9), 81.0346 (7), 154.0885 (5), 108.0225 (3)                             |
| Caftaric acid                                 | 311.0407                                    | 4.8                     | 179.0363 (100), 149.0102 (53), 135.0463 (27)                                                                     |
| <i>p</i> -coumaric acid derivative            | 163.0410                                    | 6.4                     | 119.0504 (100), 163.0401 (14), 120.0551 (8), 107.0134 (3), 146.0282 (2), 121.0298 (2)                            |
| Benzoic acid                                  | 121.0297                                    | 7.7                     | 121.0296 (100), 122.0331 (14), 92.0258 (2), 120.0225 (2), 93.0349 (1)                                            |
| <i>p</i> -coumaric acid                       | 163.0409                                    | 9.6                     | 119.0507 (100), 163.0400 (14), 120.0538 (7), 164.0437 (2), 164.0729 (2), 117.0342 (1), 93.0354 (1)               |
| Chicoric acid                                 | 473.0729                                    | 10.6                    | 149.0106 (100), 179.0357 (89), 311.0419 (46), 293.0321 (23), 135.0454 (10)                                       |
| <b>Aqueous Extracts obtained from Leaves</b>  |                                             |                         |                                                                                                                  |
| Malic acid                                    | 133.0145                                    | 1.4                     | 115.0038 (100), 71.0140 (69), 133.0143 (50), 72.9931 (25), 89.0241 (17)                                          |
| Vanillic acid                                 | 167.0355                                    | 3.6                     | 167.0361 (100), 123.0458 (78), 108.0214 (9), 152.0133 (4)                                                        |
| Protocatechuic acid                           | 153.0203                                    | 4.2                     | 109.0298 (100), 153.0192 (19), 108.0226 (19), 96.9610 (9), 110.0317 (9), 152.0298 (5), 123.0454 (5), 81.0346 (4) |
| Caftaric acid                                 | 311.0414                                    | 4.9                     | 179.0361 (100), 149.0100 (63), 135.0457 (47)                                                                     |
| <i>p</i> -coumaric acid derivative            | 163.0407                                    | 6.4                     | 119.0505 (100), 163.0407 (17), 120.0532 (9), 119.45 (2), 93.0360 (2)                                             |
| Benzoic acid                                  | 121.0294                                    | 7.7                     | 121.0297 (100), 122.0343 (22), 81.0363 (4), 108.0233 (2), 120.5480 (2)                                           |
| <i>p</i> -coumaric acid                       | 163.0407                                    | 9.6                     | 119.0505 (100), 163.0410 (14), 120.0537 (12), 147.0462 (3), 164.0444 (3)                                         |
| Chicoric acid                                 | 473.0731                                    | 10.6                    | 149.0101 (100), 179.036 (85), 311.042 (68), 293.0307 (32), 135.0461 (12), 112.9881 (12)                          |
| <b>Aqueous Extracts obtained from Roots</b>   |                                             |                         |                                                                                                                  |

|                                                  |          |      |                                                                                           |
|--------------------------------------------------|----------|------|-------------------------------------------------------------------------------------------|
| Malic acid                                       | 133.0149 | 1.4  | 115.0036 (100), 71.0139 (73), 133.0146 (40), 72.9930 (25), 89.0244 (17)                   |
| <i>p</i> -coumaric acid derivative               | 163.0410 | 6.4  | 119.0504 (100), 120.0523 (13), 163.0436 (9)                                               |
| Benzoic acid                                     | 121.0292 | 7.8  | 121.0306 (100), 108.0224 (16), 122.0352 (10), 93.0341 (7)                                 |
| Chicoric acid                                    | 473.0725 | 10.6 | 149.0094 (100), 311.0415 (84), 179.0357 (80), 293.0312 (26), 135.0453 (15), 112.9883 (10) |
| <b>Ethanollic Extracts obtained from Flowers</b> |          |      |                                                                                           |
| Malic acid                                       | 133.0143 | 1.3  | 115.0039 (100), 71.0139 (85), 133.0149 (53), 72.9929 (28), 43.0188 (11), 89.0238 (10)     |
| Vanillic acid                                    | 167.0350 | 3.6  | 167.0355 (100), 123.0444 (60), 108.0203 (15), 152.0124 (9)                                |
| Protocatechuic acid                              | 153.0199 | 4.2  | 109.0297 (100), 153.0202 (44), 108.0219 (12), 110.0333 (11), 154.0229 (3)                 |
| Caftaric acid                                    | 311.0409 | 4.8  | 179.0354 (100), 149.0094 (53), 135.0452 (40)                                              |
| Chlorogenic acid                                 | 353.0868 | 6.4  | 191.0564 (100), 192.0595 (9), 161.0243 (3), 193.0612 (2), 353.0861 (1), 179.0335 (1)      |
| Caffeic acid                                     | 179.0352 | 7.3  | 135.0453 (100), 179.0353 (28), 136.0485 (12), 134.0374 (9), 180.0394 (5), 107.0503 (1)    |
| Benzoic acid                                     | 121.0289 | 7.7  | 121.0290 (100), 122.0318 (9), 120.0202 (2), 92.0245 (1)                                   |
| <i>p</i> -coumaric acid                          | 163.0404 | 9.6  | 119.0504 (100), 163.0407 (17), 120.0544 (14), 162.8385 (7), 117.0362 (3)                  |
| Chicoric acid                                    | 473.0731 | 10.6 | 149.0092 (100), 179.0352 (71), 311.0402 (43), 293.0292 (21), 112.9875 (13), 135.0452 (11) |
| Rutin                                            | 609.1451 | 10.8 | 609.1450 (100), 610.1469 (34), 300.0273 (25), 301.0343 (17), 611.1503 (7)                 |
| Rutin derivative                                 | 609.1446 | 11.0 | 609.1445 (100), 610.1480 (33), 300.0272 (23), 301.0345 (20), 611.1494 (8)                 |
| Quercetin                                        | 301.0349 | 16.8 | 301.0340 (100), 151.0036 (36), 178.9980 (28), 302.0386 (16), 121.0291 (7)                 |
| <b>Ethanollic Extracts obtained from Leaves</b>  |          |      |                                                                                           |
| Malic acid                                       | 133.0143 | 1.4  | 115.0044 (100), 71.0138 (90), 72.9934 (40), 133.0130 (24), 89.0239 (8)                    |
| Protocatechuic acid                              | 153.0195 | 4.2  | 109.0299 (100), 123.0453 (74), 153.0189 (35), 153.0543 (20), 108.0187 (14), 110.032 (13)  |
| Caftaric acid                                    | 311.0400 | 4.9  | 179.0354 (100), 149.0094 (50), 135.0454 (31)                                              |
| Vanillin                                         | 151.0397 | 6.9  | 151.0414 (100), 109.0275 (21), 107.0502 (10), 108.4068 (8)                                |
| Caffeic acid                                     | 179.0349 | 7.3  | 135.0453 (100), 179.0355 (36), 136.0483 (10), 134.0369 (6), 180.0384 (5), 107.0501 (1)    |
| Benzoic acid                                     | 121.0293 | 7.7  | 121.0287 (100), 122.0334 (8), 120.0232(5), 108.0246 (3)                                   |
| Chicoric acid                                    | 473.0706 | 10.6 | 179.0349 (100), 149.0089 (96), 311.0389 (84), 293.0294 (30), 112.9874 (9), 135.0447 (7)   |
| Rutin derivative                                 | 609.1458 | 11.0 | 609.1453 (100), 610.1492 (26) 300.0291 (21), 301.0344 (18), 611.1486 (9)                  |

| Ethanollic Extracts obtained from Roots           |          |      |                                                                                         |
|---------------------------------------------------|----------|------|-----------------------------------------------------------------------------------------|
| Malic acid                                        | 133.0146 | 1.3  | 115.0042 (100), 71.0139 (62), 133.0156 (35), 72.9928 (22), 89.0246 (10), 43.0195 (8)    |
| Caftaric acid                                     | 311.0419 | 4.9  | 179.0363 (100), 149.0105 (63), 135.0460 (23)                                            |
| Chlorogenic acid                                  | 353.0882 | 6.4  | 191.0568 (100), 192.0589 (9), 353.0877 (4), 161.0243 (3), 179.0363 (1)                  |
| Quinic acid                                       | 191.0565 | 6.4  | 191.0566 (100), 102.9488 (16), 93.0336 (6)                                              |
| Caffeic acid                                      | 179.0356 | 7.3  | 135.0456 (100), 179.0355 (48), 136.0493 (12), 134.0377 (9), 180.0397 (2), 107.0514 (1)  |
| Benzoic acid                                      | 121.0296 | 7.7  | 121.0295 (100), 122.0330 (16), 108.0202 (6)                                             |
| <i>p</i> -coumaric acid                           | 163.0399 | 9.6  | 119.0506 (100), 163.0416 (22), 162.8389 (18), 120.0542 (9)                              |
| Chicoric acid                                     | 473.0716 | 10.6 | 149.0094 (100), 179.0351 (80), 311.0401 (57), 293.0300 (26), 135.0450 (10), 112.988 (8) |
| Dichloromethanolic Extracts obtained from Flowers |          |      |                                                                                         |
| Caffeic acid                                      | 179.0358 | 7.3  | 135.0447 (100), 179.0352 (68), 134.0397 (53), 180.9211 (24), 136.0509 (23)              |
| Benzoic acid                                      | 121.0295 | 7.7  | 121.0295 (100), 122.0323 (15), 108.0234 (5), 120.0219 (4), 93.0358 (3)                  |
| Chicoric acid                                     | 473.0745 | 10.5 | 149.0106 (76), 179.0362 (58), 311.0409 (53)                                             |
| Dichloromethanolic Extracts obtained from Leaves  |          |      |                                                                                         |
| Malic acid                                        | 133.0145 | 1.3  | 115.0038 (100), 133.0151 (76), 71.0134 (73), 43.0191 (30), 89.0219 (29), 72.9927 (21)   |
| Caftaric acid                                     | 311.0407 | 4.8  | 179.0350 (100), 149.0098 (80), 135.0442 (21)                                            |
| Caffeic acid                                      | 179.0358 | 7.3  | 135.0449 (100), 179.0357 (26), 134.0381 (9), 136.8699 (8)                               |
| Benzoic acid                                      | 121.0292 | 7.7  | 121.0295 (100), 122.0330 (8), 108.0216 (5), 120.0237 (2), 121.2224 (2), 93.0341 (1)     |
| Chicoric acid                                     | 473.0714 | 10.6 | 179.0356 (100), 149.0097 (94), 311.0410 (41), 293.0328 (13), 135.045 (5)                |
| Dichloromethanolic Extracts obtained from Roots   |          |      |                                                                                         |
| Malic acid                                        | 133.0140 | 1.3  | 115.0035 (100), 71.0139 (51), 133.014 (27), 72.9941(19), 89.0261 (15), 132.8685 (10)    |
| Vanillic acid derivative                          | 167.0347 | 6.6  | 152.0117 (100), 167.0356 (27), 152.2865 (2), 152.1520 (2), 108.0218 (2)                 |
| Caffeic acid                                      | 179.0351 | 7.3  | 135.0458 (100), 179.0352 (40), 134.0366 (5), 180.0359 (5), 107.0526 (4), 136.0465 (2)   |
| Benzoic acid                                      | 121.0290 | 7.7  | 121.0296 (100), 122.0325 (9), 93.0334 (3), 108.0223 (3), 120.0218 (2)                   |
| <i>p</i> -coumaric acid                           | 163.0403 | 9.5  | 119.0509 (100), 163.0405 (30), 162.8403 (18), 120.0524 (6)                              |

<sup>1</sup> The MS<sup>2</sup> data were obtained from the fragmentation of the [M – H]<sup>–</sup> precursor ion of phenolic/acid compounds. Relative intensities of product ions are in parentheses.

**Table S3.** Alkylamides compounds tentatively identified in *E. purpurea* extracts by LC-HRMS (positive mode). F: flowers; L: leaves; R: roots; AE: aqueous extracts; EE: ethanolic extracts; DE: dichloromethanolic extracts.

| Proposed alkylamide compound                              | Precursor ion<br>[M + H] <sup>+</sup> (m/z) | t <sub>R</sub><br>(min) | Product ions (m/z) <sup>1</sup>                                                                                                                                                                                                                                                                  |
|-----------------------------------------------------------|---------------------------------------------|-------------------------|--------------------------------------------------------------------------------------------------------------------------------------------------------------------------------------------------------------------------------------------------------------------------------------------------|
| <b>Aqueous Extracts obtained from Flowers</b>             |                                             |                         |                                                                                                                                                                                                                                                                                                  |
| Dodeca-2E,4Z,10E-triene-8-ynoic acid isobutylamide        | 246.1872                                    | 15.4                    | 57.0702 (100), 128.0627 (27), 93.0712 (4), 145.1034 (3), 74.0963 (3), 173.0890 (2), 119.0876 (1), 190.5467 (0.1)                                                                                                                                                                                 |
| Dodeca-2E,4Z,10Z-triene-8-ynoic acid isobutylamide        | 246.1870                                    | 15.8                    | 57.0702 (100), 128.0623 (26), 93.0710 (5), 173.0962 (2), 102.0913 (2), 119.0857 (1), 74.0384 (1)                                                                                                                                                                                                 |
| Dodeca-2E,4E,10E-triene-8-ynoic acid isobutylamide        | 246.1860                                    | 20.1                    | 57.0696 (100), 128.0618 (6), 119.0845 (2), 145.1025 (1), 74.0954 (1)                                                                                                                                                                                                                             |
| Undeca-2E,4Z-diene-8,10-diynoic acid isobutylamide        | 230.1551                                    | 20.2                    | 57.0697 (100), 128.0622 (29), 91.0544 (23), 116.0618 (10), 129.0687 (8), 103.0539 (4), 117.0674 (2), 102.0910 (1), 74.0961 (1), 157.0652 (0.2), 174.0929 (0.1), 43.0541 (0.1)                                                                                                                    |
| Undeca-2E/Z-ene-8,10-diynoic acid isobutylamide           | 232.1705                                    | 20.4                    | 57.0698 (100), 91.0543 (58), 41.0383 (38), 79.0538 (31), 65.0382 (20), 115.0541 (19), 105.0701 (17), 131.0843 (4), 74.0966 (0.8), 159.0816 (0.3), 176.1021 (0.3)                                                                                                                                 |
| Dodeca-2E,4Z-diene-8,10-diynoic acid isobutylamide        | 244.1703                                    | 20.7                    | 57.0695 (100), 43.0538 (31), 128.0623 (28), 105.0695 (6), 117.0686 (5), 143.0827 (2), 102.0930 (1), 39.0222 (1), 74.0944 (0.3)                                                                                                                                                                   |
| Dodeca-2E-ene-8,10-diynoic acid isobutylamide             | 246.1857                                    | 20.9                    | 81.0697 (1), 145.1011 (1), 105.0689 (1), 57.0693 (1), 74.0961 (1), 91.0549 (1), 173.0961 (1), 79.0542 (0.4), 67.0542 (0.3), 102.0553 (0.1), 190.1246 (0.2), 41.0365 (0), 77.0060 (0)                                                                                                             |
| Trideca-2E,7Z-diene-10,12-diynoic acid isobutylamide      | 258.1861                                    | 20.9                    | 57.0697 (100), 117.0699 (43), 128.0618 (32), 103.0540 (12), 131.0846 (4), 43.0541 (3), 157.1002 (2), 74.0969 (2), 202.1241 (0.4), 185.0984 (0.2)                                                                                                                                                 |
| Trideca-2E,7Z-diene-10,12-diynoic acid 2-methylbutylamide | 272.2015                                    | 21.2                    | 71.0846 (9), 157.1020 (9), 202.1231 (5)                                                                                                                                                                                                                                                          |
| Dodeca-2E,4E,8Z,10E/Z-tetraenoic acid isobutylamide       | 248.2031                                    | 21.2                    | 57.0696 (100), 67.0539 (72), 68.0616 (52), 152.1072 (33), 81.0692 (26), 79.0536 (20), 41.038 (18), 66.0461 (17), 167.1307 (8), 100.0757 (6), 74.0967 (1), 147.1177 (1), 102.0909 (1), 168.1345 (1), 121.1010 (0.3), 109.1007 (0.3), 175.1121 (0.2), 142.1233 (0.2), 128.1077 (0.2), 192.4037 (0) |

|                                                          |          |      |                                                                                                                                                                                                                                           |
|----------------------------------------------------------|----------|------|-------------------------------------------------------------------------------------------------------------------------------------------------------------------------------------------------------------------------------------------|
| Dodeca-2E,4E,8Z-trienoic acid isobutylamide              | 250.2169 | 21.5 | 57.0696 (100), 168.1361 (1), 102.0909 (1), 194.1562 (0.4), 74.0962 (0.3), 177.1294 (0.1)                                                                                                                                                  |
| Dodeca-2E,4E,8Z,10E/Z-tetraenoic acid 2-methylbutylamide | 262.2170 | 21.5 | 71.0858 (100), 147.1124 (3), 116.1099 (3)                                                                                                                                                                                                 |
| Dodeca-2E,4E-dienoic acid isobutylamide                  | 252.2323 | 22.0 | 57.0694 (100), 67.0540 (50), 55.0538 (50), 81.0688 (36), 69.0696 (31), 81.032 (23), 43.0541 (15), 95.0845 (11), 196.1707 (8), 154.1237 (2), 179.1433 (2), 168.1324 (2), 99.0653 (2), 74.0961 (1), 85.0643 (1), 151.1499 (1), 139.0968 (1) |
| <b>Aqueous Extracts obtained from Roots</b>              |          |      |                                                                                                                                                                                                                                           |
| Dodeca-2E,4Z,10E-triene-8-ynoic acid isobutylamide       | 246.1857 | 15.3 | 57.0690 (100), 128.0614 (6), 119.0854 (2), 102.0923 (2), 93.0696 (1)                                                                                                                                                                      |
| Dodeca-2E,4Z,10Z-triene-8-ynoic acid isobutylamide       | 246.1859 | 15.8 | 57.0693 (100), 128.0608 (9), 145.1005 (4), 93.0697 (3), 154.1243 (1)                                                                                                                                                                      |
| Dodeca-2E,4E,10Z-triene-8-ynoic acid isobutylamide       | 246.1853 | 19.0 | 57.0694 (100), 128.0618 (7), 119.0843 (2), 93.0700 (2), 190.1226 (1), 154.0629 (1), 145.1028 (1), 102.0465 (1), 74.0936 (1)                                                                                                               |
| Dodeca-2Z,4E,10Z-triene-8-ynoic acid isobutylamide       | 246.1857 | 19.4 | 57.0697 (100), 128.0618 (15), 145.1013 (7), 173.0946 (2), 119.0884 (2), 102.0902 (2), 93.0610 (1), 74.0978 (1)                                                                                                                            |
| Undeca-2E,4Z-diene-8,10-diynoic acid isobutylamide       | 230.1548 | 20.2 | 57.0696 (100), 128.0619 (26), 91.054 (25), 116.0617 (10), 129.0687 (6), 103.0541 (3), 117.0650 (1), 102.0896 (1), 74.0961 (1), 174.0910 (0.3), 157.0669 (0.3), 43.0536 (0.3)                                                              |
| Undeca-2Z,4E-diene-8,10-diynoic acid isobutylamide       | 230.1561 | 20.5 | 57.0698 (100), 128.0623 (72), 91.0544 (49), 129.0691 (23), 103.0543 (7), 174.0909 (1), 157.0653 (1), 74.0968 (1), 102.0905 (0.4), 202.1197 (0.1)                                                                                          |
| Dodeca-2E,4Z-diene-8,10-diynoic acid isobutylamide       | 244.1712 | 20.6 | 57.0697 (100), 128.0621 (75), 91.0542 (20), 117.0701 (19), 105.0697 (17), 143.0857 (7), 39.0225 (4), 154.0657 (2), 43.0536 (2), 188.1083 (1), 171.0819 (1), 102.0914 (1), 74.0963 (1), 216.1393 (0.1)                                     |
| Dodeca-2Z,4E-diene-8,10-diynoic acid isobutylamide       | 244.1708 | 20.9 | 57.0697 (100), 128.0621 (77), 105.0700 (33), 91.0542 (30), 117.0701 (26), 143.0859 (7), 39.0223 (5), 43.054 (5), 188.1076 (1), 171.0812 (1), 74.0967 (1), 216.137 (0.2), 102.0906 (0.2), 202.1635 (0.1), 154.1228 (0.1)                   |
| Trideca-2E,7Z-diene-10,12-diynoic acid isobutylamide     | 258.1856 | 21.0 | 43.0539 (100), 128.0621 (66), 117.0697 (21), 103.0539 (7), 57.0693 (7), 131.0800 (1), 74.0975 (0.4)                                                                                                                                       |



|                                                                                                                     |          |      |                                                                                                                                                                                                                                                                  |
|---------------------------------------------------------------------------------------------------------------------|----------|------|------------------------------------------------------------------------------------------------------------------------------------------------------------------------------------------------------------------------------------------------------------------|
| Dodeca-2,4-diene-8,10-diynoic acid 2-methylbutylamide                                                               | 258.1856 | 21.0 | 71.0856 (64), 91.0540 (25), 117.0697 (21), 105.0699 (20), 143.0857 (7), 57.0693 (7), 171.0806 (2), 188.1071 (1), 116.1053 (1), 88.1117 (0.4), 29.0374 (0.2), 230.1451 (0.1), 168.1363 (0.1)                                                                      |
| <i>Dodeca-2Z,4Z,10Z-triene-8-ynoic acid isobutylamide*</i>                                                          | 246.1858 | 21.1 | 57.0697 (100), 128.0621 (23), 145.1013 (6), 173.0953 (2), 119.0862 (2), 93.0690 (2), 102.0904 (1), 74.0967 (1), 190.1215 (0.3)                                                                                                                                   |
| Dodeca-2E,4E,8Z,10E/Z-tetraenoic acid isobutylamide                                                                 | 248.2023 | 21.2 | 57.0698 (100), 67.0541 (66), 68.0619 (44), 81.0694 (22), 152.1072 (21), 41.0383 (16), 79.0537 (15), 66.0462 (14), 167.1306 (5), 100.0756 (5), 102.091 (1), 74.0968 (1), 168.1348 (1), 147.1168 (0.3), 121.1018 (0.1), 128.1082 (0.1), 175.1107 (0), 192.1384 (0) |
| Dodeca-2E,4Z,10E-triene-8-ynoic acid 2-methylbutylamide<br>OR<br>Dodeca-2E-ene-8,10-diynoic acid 2-methylbutylamide | 260.2018 | 21.2 | 71.0856 (40), 131.0867 (6), 145.1005 (5), 119.0852 (5), 190.1241 (1), 173.0948 (0.4), 88.1121 (0.4), 116.1222 (0.3)                                                                                                                                              |
| Pentadeca-2E,9Z-diene-12,14-diynoic acid isobutylamide                                                              | 286.2179 | 21.4 | 57.0699 (100), 74.0967 (16), 230.8572 (6), 213.1114 (6)                                                                                                                                                                                                          |
| Dodeca-2E,4E,8Z-trienoic acid isobutylamide                                                                         | 250.2167 | 21.5 | 57.0697 (100), 194.1552 (1), 168.1350 (1), 149.1320 (1), 83.0840 (1), 74.0964 (1), 177.1256 (0.4), 97.1028 (0.4)                                                                                                                                                 |
| Dodeca-2E,4E-dienoic acid isobutylamide                                                                             | 252.2325 | 21.9 | 57.0697 (100), 55.0540 (57), 67.0541 (44), 69.0696 (31), 81.0334 (31), 81.0694 (25), 95.049 (13), 43.0538 (11), 196.1693 (5), 168.1348 (3), 74.0948 (3), 154.1229 (2), 179.1475 (1), 210.1826 (0.4), 139.1165 (0.4), 151.1470 (0.3), 102.0896 (0.3)              |
| <b>Ethanollic Extracts obtained from Flowers</b>                                                                    |          |      |                                                                                                                                                                                                                                                                  |
| Dodeca-2E,4Z,10E-triene-8-ynoic acid isobutylamide                                                                  | 246.1853 | 15.4 | 57.0695 (100), 128.0617 (20), 145.1002 (13), 119.0864 (4), 74.0973 (4), 173.0958 (2), 93.0677 (2), 154.1263 (1), 190.0642 (0.4), 102.0782 (0.1)                                                                                                                  |
| Dodeca-2E,4Z,10Z-triene-8-ynoic acid isobutylamide                                                                  | 246.1851 | 15.8 | 57.0692 (100), 128.0615 (16), 145.1014 (4), 119.0863 (3), 93.0674 (2), 173.0975 (1), 102.0908 (1), 74.0970 (1)                                                                                                                                                   |
| Dodeca-2E,4E,10Z-triene-8-ynoic acid isobutylamide                                                                  | 246.1857 | 19.0 | 57.0695 (100), 145.1013 (11), 128.0617 (9), 74.0969 (2), 119.0851 (1), 93.0697 (1), 190.1204 (0.4), 173.0881 (0.4)                                                                                                                                               |

|                                                                 |          |      |                                                                                                                                                                                                                                                                             |
|-----------------------------------------------------------------|----------|------|-----------------------------------------------------------------------------------------------------------------------------------------------------------------------------------------------------------------------------------------------------------------------------|
| Dodeca-2E,4E,10E-triene-8-ynoic acid isobutylamide              | 246.1854 | 20.1 | 57.0696 (41), 128.0618 (6), 119.0848 (3), 93.0691 (2), 145.1021 (1), 173.0958 (0.3), 74.0965 (0.3)                                                                                                                                                                          |
| Undeca-2E,4Z-diene-8,10-diynoic acid isobutylamide              | 230.1571 | 20.2 | 57.0694 (100), 128.0618 (69), 91.0538 (33), 116.0614 (21), 129.0684 (15), 103.0536 (6), 117.0642 (3), 157.0653 (1), 102.0912 (1), 74.0967 (1), 174.0915 (0.3), 43.0534 (0.2)                                                                                                |
| Undeca-2E/Z-ene-8,10-diynoic acid isobutylamide                 | 232.1698 | 20.4 | 57.0696 (100), 91.0541 (81), 41.0382 (49), 79.0537 (41), 105.0696 (32), 65.0383 (29), 115.0540 (28), 131.0851 (9), 176.1067 (1), 159.0802 (1), 102.0902 (0.3), 74.0966 (0.3)                                                                                                |
| Pentadeca-2E,9Z-diene-12,14-diynoic acid 2-hydroxyisobutylamide | 302.2118 | 20.6 | 118.0746 (6), 73.0851 (4), 230.065 (1), 213.2401 (1), 185.1340 (1), 90.0554 (1)                                                                                                                                                                                             |
| Dodeca-2E,4Z-diene-8,10-diynoic acid isobutylamide              | 244.1704 | 20.7 | 57.0697 (83), 43.0539 (64), 128.062 (56), 91.0543 (30), 105.0701 (8), 117.0693 (7), 39.0226 (4), 143.0858 (2), 74.0970 (1), 171.0803 (0.2), 202.1285 (0.1), 188.1057 (0.1), 216.1477 (0), 142.1229 (0)                                                                      |
| Dodeca-2E-ene-8,10-diynoic acid isobutylamide                   | 246.1852 | 20.8 | 57.0696 (100), 67.0541 (63), 79.0538 (23), 91.0540 (21), 41.0383 (20), 105.0697 (13), 77.0385 (8), 81.0692 (5), 145.1015 (2), 190.1228 (1), 102.0914 (1), 74.0969 (1), 173.0962 (0.3)                                                                                       |
| Trideca-2E,7Z-diene-10,12-diynoic acid isobutylamide            | 258.1898 | 20.9 | 117.0698 (100), 57.0697 (61), 128.0617 (34), 131.0856 (32), 157.1016 (16), 103.0538 (9), 202.1231 (6), 185.0966 (5), 74.0968 (2), 142.1198 (1), 43.0540 (1), 230.1522 (0.3), 216.1379 (0.3), 102.0916 (0)                                                                   |
| Dodeca-2,4-diene-8,10-diynoic acid 2-methylbutylamide           | 258.1898 | 20.9 | 117.0698 (100), 57.0697 (61), 91.0540 (37), 143.0852 (17), 116.0599 (12), 202.1231 (6), 142.1198 (1), 171.0774 (0.4), 230.1522 (0.3), 188.1074 (0.1), 71.0858 (0.1), 29.0371 (0.1),                                                                                         |
| Dodeca-2E,4Z,10E-triene-8-ynoic acid 2-methylbutylamide<br>OR   | 260.2001 | 21.0 | 116.0604 (20), 145.1016 (7), 71.0857 (7), 119.0853 (5), 142.1229 (0.3), 173.0810 (0.1)                                                                                                                                                                                      |
| Dodeca-2E-ene-8,10-diynoic acid 2-methylbutylamide              |          |      |                                                                                                                                                                                                                                                                             |
| Trideca-2E,7Z-diene-10,12-diynoic acid 2-methylbutylamide       | 272.2009 | 21.1 | 71.0859 (28), 157.1015 (2), 202.1229 (1), 185.0991 (1), 88.1128 (1)                                                                                                                                                                                                         |
| Dodeca-2E,4E,8Z,10E/Z-tetraenoic acid isobutylamide             | 248.2041 | 21.3 | 57.0699 (100), 67.0541 (92), 152.108 (90), 68.0617 (74), 81.0692 (45), 79.0534 (36), 41.0379 (35), 66.0457 (33), 167.1318 (26), 100.0762 (9), 168.1352 (3), 102.0918 (3), 74.0968 (2), 147.1178 (2), 109.1012 (1), 128.1079 (1), 121.1014 (1), 175.113 (1), 142.1238 (0.2), |

|                                                                 |          |      |                                                                                                                                                                                                                                                                    |
|-----------------------------------------------------------------|----------|------|--------------------------------------------------------------------------------------------------------------------------------------------------------------------------------------------------------------------------------------------------------------------|
| Dodeca-2E,4E,8Z-trienoic acid isobutylamide (isomer 1)          | 250.2146 | 21.4 | 57.0697 (100), 83.0357 (3), 169.1346 (2), 102.0908 (2), 154.1196 (1), 74.0959 (1), 149.1336 (0.4), 194.1543 (0.1), 177.1261 (0.1), 97.1015 (0.1)                                                                                                                   |
| Pentadeca-2E,9Z-diene-12,14-diynoic acid isobutylamide          | 286.2160 | 21.4 | 57.0697 (99), 74.097 (2), 230.1521 (1), 185.1325 (1)                                                                                                                                                                                                               |
| Dodeca-2E,4E,8Z-trienoic acid isobutylamide                     | 250.2173 | 21.5 | 57.0696 (100), 168.135 (2), 102.0911 (2), 83.0358 (2), 74.0970 (2), 194.1540 (1), 177.1272 (1), 154.1219 (1), 149.1336 (1)                                                                                                                                         |
| Dodeca-2E,4E,8Z,10E/Z-tetraenoic acid 2-methylbutylamide        | 262.2165 | 21.5 | 71.0855 (100), 116.1071 (2), 147.1175 (1), 88.1122 (1), 192.1400 (0.3), 175.1121 (0.2)                                                                                                                                                                             |
| Dodeca-2E,4E-dienoic acid isobutylamide                         | 252.2361 | 21.9 | 57.0696 (100), 55.0539 (86), 81.0328 (77), 67.0539 (54), 69.0697 (53), 81.0695 (46), 95.0855 (31), 196.1706 (21), 43.0537 (15), 154.1234 (7), 179.1437 (3), 168.1387 (3), 74.0971 (3), 151.1492 (2), 85.1013 (0.4), 210.1858 (0.3), 116.1071 (0.2), 102.0909 (0.2) |
| <b>Ethanollic Extracts obtained from Leaves</b>                 |          |      |                                                                                                                                                                                                                                                                    |
| Dodeca-2E,4E,10E-triene-8-ynoic acid isobutylamide              | 246.1860 | 20.0 | 57.0695 (100), 128.0615 (12), 119.0855 (3), 93.0695 (3), 173.0814 (1), 145.1023 (2), 102.0878 (1), 74.0967 (1)                                                                                                                                                     |
| Undeca-2E,4Z-diene-8,10-diynoic acid isobutylamide              | 230.1540 | 20.2 | 57.0699 (100), 91.0538 (28), 128.0617 (25), 129.0690 (7), 116.0626 (7), 43.0539 (6), 103.0536 (4), 117.0683 (2), 202.0911 (1), 157.0989 (1), 102.0906 (1), 188.1023 (0.3)                                                                                          |
| Pentadeca-2E,9Z-diene-12,14-diynoic acid 2-hydroxyisobutylamide | 302.2113 | 20.6 | 118.0742 (5), 185.1314 (3), 213.1242 (1), 73.0647 (1), 90.0923 (0.2)                                                                                                                                                                                               |
| Dodeca-2E-ene-8,10-diynoic acid isobutylamide                   | 246.1850 | 20.9 | 57.0694 (100), 67.0538 (52), 41.0380 (19), 79.0535 (13), 81.0689 (11), 105.0694 (6), 91.0535 (5), 77.0394 (3), 173.0918 (1), 145.0989 (1), 102.0913 (1), 74.0975 (1)                                                                                               |
| Dodeca-2E,4E,8Z,10E/Z-tetraenoic acid isobutylamide             | 248.2010 | 21.2 | 57.0696 (100), 67.0539 (51), 68.0617 (32), 152.1066 (16), 41.0382 (13), 81.0691 (13), 79.0536 (12), 66.0463 (10), 109.1012 (1), 102.0911 (1), 175.1108 (0.3), 168.1313 (0.3), 192.1359 (0.2), 147.1214 (0.2), 142.1261 (0.2), 74.0955 (0.2),                       |
| Dodeca-2E,4E-dienoic acid isobutylamide (isomer 1)              | 252.2321 | 21.4 | 57.0694 (30), 168.1338 (1), 85.1011 (1), 194.1705 (0.4), 139.1418 (0.4), 116.0625 (0.4), 74.0969 (0.4), 102.0912 (0.3)                                                                                                                                             |

|                                                        |          |      |                                                                                                                                                                                                                                           |
|--------------------------------------------------------|----------|------|-------------------------------------------------------------------------------------------------------------------------------------------------------------------------------------------------------------------------------------------|
| Pentadeca-2E,9Z-diene-12,14-diynoic acid isobutylamide | 286.2165 | 21.4 | 57.0695 (99), 74.0947 (5), 185.1301 (3), 230.1547 (1),                                                                                                                                                                                    |
| Dodeca-2E,4E-dienoic acid isobutylamide                | 252.2317 | 21.9 | 57.0694 (100), 55.0538 (53), 67.0537 (52), 69.0696 (30), 81.0687 (28), 81.0328 (25), 95.0848 (9), 196.1683 (8), 43.0535 (8), 154.1222 (2), 179.1426 (1), 151.151 (1), 102.0928 (1), 74.0979 (1)                                           |
| <b>Ethanollic Extracts obtained from Roots</b>         |          |      |                                                                                                                                                                                                                                           |
| Dodeca-2E,4Z,10E-triene-8-ynoic acid isobutylamide     | 246.1881 | 15.3 | 57.0707 (100), 128.0629 (14), 93.0723 (3), 145.1034 (2), 119.0879 (1)                                                                                                                                                                     |
| Dodeca-2E,4Z,10Z-triene-8-ynoic acid isobutylamide     | 246.1872 | 15.8 | 57.0704 (100), 128.0636 (14), 119.0856 (2), 154.1251 (1), 74.0973 (1)                                                                                                                                                                     |
| Dodeca-2E,4E,10Z-triene-8-ynoic acid isobutylamide     | 246.1869 | 19.0 | 57.0702 (100), 128.0633 (9), 145.1023 (4), 119.0849 (3), 102.0928 (3), 93.0694 (3), 173.0944 (1), 74.0960 (1), 190.1292 (0.3)                                                                                                             |
| Dodeca-2Z,4E,10Z-triene-8-ynoic acid isobutylamide     | 246.1869 | 19.4 | 57.0699 (100), 145.1016 (11), 128.0613 (10), 93.0695 (3), 173.0976 (2), 119.0861 (2), 190.1227 (1), 74.0888 (1)                                                                                                                           |
| Dodeca-2E,4E,10E-triene-8-ynoic acid isobutylamide     | 246.1863 | 20.1 | 57.0698 (100), 128.0624 (15), 93.0703 (2), 173.0286 (1), 154.1231 (1), 119.0867 (1), 102.0906 (1), 145.0977 (0.3)                                                                                                                         |
| Undeca-2E,4Z-diene-8,10-diynoic acid isobutylamide     | 230.1586 | 20.2 | 57.0703 (100), 128.0628 (64), 91.0549 (34), 129.0695 (16), 103.0548 (6), 102.0921 (1), 74.0977 (1), 174.0920 (0.4), 157.0667 (0.4), 43.0541 (0.2)                                                                                         |
| Undeca-2Z,4E-diene-8,10-diynoic acid isobutylamide     | 230.1580 | 20.5 | 129.0702 (100), 128.0625 (88), 57.0701 (85), 91.0545 (64), 116.0624 (51), 157.0661 (15), 174.0928 (13), 103.0544 (10), 117.0656 (7), 202.1241 (1), 102.0915 (1), 74.0972 (1), 188.1078 (0.2), 43.0546 (0.2)                               |
| Dodeca-2E,4Z-diene-8,10-diynoic acid isobutylamide     | 244.1737 | 20.7 | 128.0626 (100), 57.0700 (66), 117.0704 (22), 91.0543 (22), 105.0702 (18), 143.0865 (10), 43.0541 (5), 39.0227 (5), 171.0816 (2), 188.1089 (1), 102.0915 (1), 74.0970 (1), 216.1401 (0.1), 154.1200 (0.1), 202.1225 (0), 142.1286 (0)      |
| Undeca-2E,4E-diene-8,10-diynoic acid isobutylamide     | 230.1552 | 20.8 | 57.0701 (100), 128.0628 (52), 91.0547 (29), 129.0696 (15), 116.0620 (13), 103.0544 (5), 117.0603 (4), 174.0927 (1), 157.0661 (1), 102.0927 (0.3), 74.0980 (0.2), 43.0551 (0.1)                                                            |
| Dodeca-2Z,4E-diene-8,10-diynoic acid isobutylamide     | 244.1729 | 20.9 | 128.0623 (100), 117.0701 (86), 57.0699 (84), 105.0700 (67), 143.0860 (47), 91.0541 (25), 171.0811 (17), 188.1077 (7), 43.0540 (7), 74.0966 (2), 39.0228 (2), 102.0907 (0.4), 154.1219 (0.2), 142.1228 (0.2), 202.1238 (0.1), 206.1501 (0) |

|                                                                                                                     |          |      |                                                                                                                                                                                                                                                                                                 |
|---------------------------------------------------------------------------------------------------------------------|----------|------|-------------------------------------------------------------------------------------------------------------------------------------------------------------------------------------------------------------------------------------------------------------------------------------------------|
| Dodeca-2E-ene-8,10-diynoic acid isobutylamide                                                                       | 246.1857 | 20.9 | 57.0699 (78), 67.0542 (43), 105.0701 (35), 41.0384 (34), 91.0542 (33), 79.0540 (30), 77.0385 (19), 145.1016 (6), 81.0696 (4), 173.0960 (1), 74.0969 (1), 102.0912 (0.3), 190.1233 (0.2)                                                                                                         |
| Trideca-2E,7Z-diene-10,12-diynoic acid isobutylamide                                                                | 258.1900 | 21.0 | 117.0702 (100), 128.0624 (96), 43.0542 (61), 131.0838 (9), 57.0698 (8), 103.0545 (7), 157.1016 (2), 230.1553 (2), 216.1752 (1), 202.1235 (1), 142.1236 (1), 74.0969 (1), 185.0962 (0.4), 156.1364 (0.1)                                                                                         |
| Dodeca-2,4-diene-8,10-diynoic acid 2-methylbutylamide                                                               | 258.1900 | 21.0 | 117.0702 (100), 143.0861 (75), 71.0859 (66), 105.0701 (42), 91.0544 (24), 171.0814 (23), 188.1079 (22), 116.0608 (8), 57.0698 (8), 230.1553 (2), 88.1124 (2), 202.1235 (1), 142.1236 (1), 168.1379 (0.2), 156.1364 (0.1), 29.0390 (0.1)                                                         |
| <i>Dodeca-2Z,4Z,10Z-triene-8-ynoic acid isobutylamide</i> <sup>2</sup>                                              | 246.1862 | 21.1 | 57.0701 (100), 128.0626 (50), 145.1021 (15), 119.0864 (12), 173.0969 (4), 93.0704 (4), 74.0969 (2), 190.1238 (1), 102.0915 (1), 154.122 (0.2)                                                                                                                                                   |
| Trideca-2E,7Z-diene-10,12-diynoic acid 2-methylbutylamide                                                           | 272.2018 | 21.1 | 71.0858 (21), 157.1012 (3), 202.1228 (1), 185.0954 (1), 88.1118 (1), 116.1077 (0.2)                                                                                                                                                                                                             |
| Dodeca-2E,4E,8Z,10E/Z-tetraenoic acid isobutylamide                                                                 | 248.2048 | 21.2 | 57.0702 (100), 67.0544 (91), 152.1085 (85), 68.0621 (75), 81.0697 (44), 79.0538 (36), 41.0383 (32), 66.0462 (31), 167.1324 (23), 100.0769 (10), 168.1360 (3), 102.0922 (3), 74.0974 (2), 147.1186 (1), 128.1086 (1), 121.1019 (1), 109.1021 (1), 192.1407 (0.3), 175.1132 (0.3), 142.1253 (0.2) |
| Dodeca-2E,4Z,10E-triene-8-ynoic acid 2-methylbutylamide<br>OR<br>Dodeca-2E-ene-8,10-diynoic acid 2-methylbutylamide | 260.2017 | 21.2 | 71.086 (48), 131.0861 (14), 145.1019 (13), 119.0862 (13), 173.0960 (2), 116.1079 (1), 88.1123 (1), 190.1243 (0.4), 232.2067 (0.2)                                                                                                                                                               |
| Pentadeca-2E,9Z-diene-12,14-diynoic acid isobutylamide                                                              | 286.2170 | 21.4 | 57.0701 (80), 74.0969 (2), 185.1354 (1), 230.1573 (0.2), 213.1271 (0.2)                                                                                                                                                                                                                         |
| Dodeca-2E,4E,8Z,10E/Z-tetraenoic acid 2-methylbutylamide                                                            | 262.2177 | 21.5 | 71.0859 (100), 116.1073 (3), 147.1178 (1), 145.1019 (1), 88.1117 (1), 175.1126 (0.3), 192.1368 (0.1)                                                                                                                                                                                            |
| Trideca-2Z,7Z-diene-10,12-diynoic acid 2-methylbutylamide                                                           | 272.2011 | 21.5 | 71.0862 (2), 157.1012 (2), 185.0929 (0.4), 202.1644 (0.3)                                                                                                                                                                                                                                       |
| Dodeca-2E,4E,8Z-trienoic acid isobutylamide                                                                         | 250.2180 | 21.6 | 57.0700 (100), 83.0856 (3), 168.1353 (2), 102.092 (2), 74.0973 (2), 194.1547 (1), 177.1283 (1), 154.1233 (1), 149.1336 (0.4), 97.1017 (0.2)                                                                                                                                                     |

|                                                                 |          |      |                                                                                                                                                                                                                                                                  |
|-----------------------------------------------------------------|----------|------|------------------------------------------------------------------------------------------------------------------------------------------------------------------------------------------------------------------------------------------------------------------|
| Hexadeca-2E,9Z-diene-12,14-diynoic acid isobutylamide           | 300.2323 | 21.6 | 57.0699 (74), 74.0959 (6), 227.1462 (1), 199.1527 (1)                                                                                                                                                                                                            |
| Dodeca-2E,4E-dienoic acid isobutylamide                         | 252.2359 | 21.9 | 57.0698 (100), 55.0541 (85), 81.0331 (77), 67.0542 (53), 69.0700 (50), 81.0698 (44), 95.0858 (31), 196.1711 (17), 43.0541 (16), 154.1235 (6), 179.1443 (3), 74.0972 (3), 168.1392 (2), 151.1491 (1), 85.1014 (1), 116.1084 (0.4), 210.1864 (0.2), 102.0909 (0.1) |
| <b>Dichloromethanolic Extracts obtained from Flowers</b>        |          |      |                                                                                                                                                                                                                                                                  |
| Dodeca-2E,4Z,10E-triene-8-ynoic acid isobutylamide              | 246.1857 | 15.3 | 57.0694 (100), 128.0603 (11), 146.0957 (3), 119.0840 (2), 173.0132 (2), 154.1240 (2), 93.0551 (2), 102.0267 (1), 74.0526 (1)                                                                                                                                     |
| Dodeca-2E,4Z,10Z-triene-8-ynoic acid isobutylamide2             | 246.1854 | 15.9 | 57.0692 (100), 145.1012 (8), 128.0607 (8), 93.0689 (4), 119.0840 (3), 74.0976 (3), 173.0775 (1), 102.0902 (1)                                                                                                                                                    |
| Dodeca-2,4,10-triene-8-ynoic acid isobutylamide (isomer 1)      | 246.1856 | 18.2 | 57.0694 (100), 128.0614 (19), 119.0852 (9), 145.1013 (6), 93.0700 (3), 102.0919 (2), 173.0952 (1), 154.1236 (1), 74.0967 (1),                                                                                                                                    |
| Dodeca-2E,4E,10Z-triene-8-ynoic acid isobutylamide              | 246.1856 | 19.0 | 57.0695 (100), 145.1014 (17), 128.0616 (9), 119.0851 (4), 94.0695 (3), 74.0967 (3), 190.1229 (2), 173.0601 (1), 102.0922 (1)                                                                                                                                     |
| Dodeca-2E,4E,10E-triene-8-ynoic acid isobutylamide              | 246.1854 | 20.1 | 57.0699 (9), 119.0851 (3), 128.0632 (2), 93.0694 (2), 145.0997 (1), 173.0977 (0.3)                                                                                                                                                                               |
| Undeca-2E,4Z-diene-8,10-diynoic acid isobutylamide              | 230.1573 | 20.2 | 57.0696 (100), 128.0622 (85), 91.0540 (37), 116.0619 (26), 129.0687 (20), 103.054 (7), 117.0643 (3), 174.0919 (1), 157.0657 (1), 102.0914 (1), 74.0964 (1), 43.0536 (0.3)                                                                                        |
| Undeca-2E/Z-ene-8,10-diynoic acid isobutylamide                 | 232.1700 | 20.4 | 57.0697 (100), 91.0542 (84), 41.0382 (47), 79.0539 (41), 115.0543 (34), 105.0700 (32), 65.0384 (27), 131.0857 (9), 176.1077 (2), 159.0806 (1), 74.0964 (1), 102.0916 (0.4)                                                                                       |
| Pentadeca-2E,9Z-diene-12,14-diynoic acid 2-hydroxyisobutylamide | 302.2118 | 20.6 | 213.1258 (2), 185.0949 (2), 118.0728 (2), 230.1468 (1), 90.0898 (1)                                                                                                                                                                                              |
| Dodeca-2E,4Z-diene-8,10-diynoic acid isobutylamide              | 244.1714 | 20.7 | 128.062 (71), 57.0696 (80), 43.0538 (68), 91.0539 (30), 117.0695 (10), 105.0697 (8), 39.0224 (4), 143.0853 (3), 102.0911 (1), 74.0969 (1), 188.1061 (0.3), 171.0809 (0.3)                                                                                        |
| Dodeca-2E-ene-8,10-diynoic acid isobutylamide                   | 246.1852 | 20.8 | 57.0698 (100), 67.0541 (66), 79.0538 (24), 91.0541 (23), 41.0382 (20), 105.0697 (14), 77.0385 (9), 81.0696 (6), 145.1012 (2), 190.1219 (1), 102.0909 (1), 74.0966 (1), 173.0938 (0.3)                                                                            |

|                                                                                                                     |          |      |                                                                                                                                                                                                                                                                                               |
|---------------------------------------------------------------------------------------------------------------------|----------|------|-----------------------------------------------------------------------------------------------------------------------------------------------------------------------------------------------------------------------------------------------------------------------------------------------|
| Trideca-2E,7Z-diene-10,12-diynoic acid isobutylamide                                                                | 258.1893 | 20.9 | 117.0698 (59), 128.0619 (57), 57.0695 (54), 103.0539 (16), 131.0857 (7), 157.1016 (2), 43.0538 (2), 202.1241 (1), 185.0973 (1), 74.0971 (1), 142.1203 (0.1), 230.1516 (0), 216.1391 (0), 102.0908 (0)                                                                                         |
| Dodeca-2,4-diene-8,10-diynoic acid 2-methylbutylamide                                                               | 258.1893 | 20.9 | 117.0698 (59), 91.0538 (56), 57.0695 (54), 105.0697 (21), 143.0844 (5), 202.1241 (1), 29.0380 (0.3), 171.0726 (0.1), 142.1203 (0.1), 230.1516 (0), 188.1025 (0), 156.1364 (0), 88.1078 (0)                                                                                                    |
| Dodeca-2E,4E,8Z,10E/Z-tetraenoic acid isobutylamide                                                                 | 248.2041 | 21.2 | 57.0699 (100), 67.0541 (92), 152.1077 (91), 68.0618 (74), 81.0691 (44), 41.0380 (37), 79.0534 (36), 66.0457 (33), 167.1315 (27), 100.0761 (10), 168.1350 (3), 102.0914 (3), 74.0967 (2), 175.1131 (1), 147.1176 (1), 128.1079 (1), 121.1020 (1), 109.1009 (1), 192.1382 (0.3), 142.1229 (0.3) |
| Dodeca-2E,4Z,10E-triene-8-ynoic acid 2-methylbutylamide<br>OR<br>Dodeca-2E-ene-8,10-diynoic acid 2-methylbutylamide | 260.2006 | 21.0 | 116.0602 (21), 119.0853 (5), 71.0857 (5), 145.1015 (8), 142.1219 (0.4), 190.1213 (0.1), 173.0857 (0.1), 88.1141 (0)                                                                                                                                                                           |
| Trideca-2E,7Z-diene-10,12-diynoic acid 2-methylbutylamide                                                           | 272.2009 | 21.1 | 71.0858 (27), 157.1022 (2), 202.1235 (1), 185.0945 (1), 88.1120 (1), 116.1024 (0.1)                                                                                                                                                                                                           |
| Dodeca-2E,4E,8Z-trienoic acid isobutylamide (isomer 1)                                                              | 250.2140 | 21.4 | 57.0697 (100), 158.1348 (2), 102.0915 (2), 74.0967 (2), 177.1283 (1), 154.1205 (1), 149.1328 (1), 83.0857 (0.4), 194.1552 (0.3), 97.0996 (0.1)                                                                                                                                                |
| Pentadeca-2E,9Z-diene-12,14-diynoic acid isobutylamide                                                              | 286.2154 | 21.4 | 57.0696 (93), 185.1319 (2), 230.1569 (1), 213.1262 (1), 74.0976 (1)                                                                                                                                                                                                                           |
| Dodeca-2E,4E,8Z-trienoic acid isobutylamide                                                                         | 250.2184 | 21.5 | 57.0697 (100), 168.1356 (3), 102.0917 (3), 83.0358 (3), 154.1223 (2), 74.0964 (2), 194.1550 (1), 177.1275 (1), 149.1338 (1)                                                                                                                                                                   |
| Dodeca-2E,4E,8Z,10E/Z-tetraenoic acid 2-methylbutylamide                                                            | 262.2168 | 21.5 | 71.0856 (100), 116.1075 (3), 147.1171 (1), 88.1124 (1), 175.1130 (0.4), 192.1386 (0.3)                                                                                                                                                                                                        |
| Dodeca-2E,4E-dienoic acid isobutylamide                                                                             | 252.2366 | 21.9 | 57.0695 (100), 55.0538 (86), 81.0328 (81), 67.0538 (57), 69.0697 (52), 81.0694 (47), 95.0853 (32), 196.1708 (20), 43.0537 (15), 154.1234 (8), 179.1442 (4), 74.0968 (3), 168.1394 (2), 151.1489 (2), 85.1012 (1), 210.1865 (0.4), 116.1069 (0.2), 102.0913 (0.1),                             |
| <b>Dichloromethanolic Extracts obtained from Leaves</b>                                                             |          |      |                                                                                                                                                                                                                                                                                               |

|                                                                 |          |      |                                                                                                                                                                                                                                                  |
|-----------------------------------------------------------------|----------|------|--------------------------------------------------------------------------------------------------------------------------------------------------------------------------------------------------------------------------------------------------|
| Dodeca-2E,4E,10E-triene-8-ynoic acid isobutylamide              | 246.1851 | 20.1 | 57.0694 (100), 119.0863 (6), 102.0900 (2), 190.1682 (1), 145.1028 (1)                                                                                                                                                                            |
| Undeca-2E,4Z-diene-8,10-diynoic acid isobutylamide              | 230.1542 | 20.2 | 57.0696 (100), 91.0544 (23), 128.0618 (17), 129.0679 (5), 43.0539 (4), 103.0524 (2), 157.0626 (1), 102.0889 (1), 74.0966 (1)                                                                                                                     |
| Pentadeca-2E,9Z-diene-12,14-diynoic acid 2-hydroxyisobutylamide | 302.2116 | 20.6 | 118.0730 (3), 185.1330 (2), 90.0924 (1), 213.1278 (0.4), 73.0659 (0.1)                                                                                                                                                                           |
| Dodeca-2E,4Z-diene-8,10-diynoic acid isobutylamide              | 244.1695 | 20.7 | 57.0696 (100), 43.0539 (57), 128.0624 (32), 91.0539 (21), 105.0696 (8), 117.0667 (6), 143.0854 (2), 74.0963 (2), 39.0209 (2), 188.1373 (1), 171.0779 (1), 154.1102 (1),                                                                          |
| Dodeca-2E-ene-8,10-diynoic acid isobutylamide                   | 246.1853 | 20.9 | 57.0695 (100), 67.0542 (73), 41.0383 (17), 91.0538 (13), 79.0534 (12), 81.0685 (8), 105.0694 (6), 145.0991 (1), 102.0940 (1)                                                                                                                     |
| Dodeca-2E,4E,8Z,10E/Z-tetraenoic acid isobutylamide             | 248.2009 | 21.3 | 57.0699 (100), 67.0543 (48), 68.0620 (35), 81.0697 (15), 79.0541 (13), 152.1068 (12), 41.0382 (10), 66.0464 (8), 167.1307 (5), 100.0762 (3), 168.1346 (1), 102.0920 (1), 74.0971 (1), 175. (0.2), 147.1186 (0.2), 192.1339 (0.1), 128.1075 (0.1) |
| Pentadeca-2E,9Z-diene-12,14-diynoic acid isobutylamide          | 286.2159 | 21.4 | 57.0694 (100), 185.133 (2), 230.1276 (1), 213.1644 (1), 74.0967 (1)                                                                                                                                                                              |
| Dodeca-2E,4E-dienoic acid isobutylamide                         | 252.2320 | 22.0 | 57.0696 (100), 55.0539 (70), 67.0540 (56), 81.0329 (38), 81.0695 (32), 69.0696 (32), 43.0539 (19), 95.0494 (17), 196.1698 (6), 154.1221 (3), 74.0982 (2), 179.1463 (1), 168.1379 (1), 151.1449 (1)                                               |
| <b>Dichloromethanolic Extracts obtained from Roots</b>          |          |      |                                                                                                                                                                                                                                                  |
| Dodeca-2E,4Z,10E-triene-8-ynoic acid isobutylamide              | 246.1855 | 15.4 | 57.0693 (100), 119.0855 (16), 128.062 (11), 145.0994 (10), 173.0957 (4), 93.0673 (3), 190.1252 (2), 154.1219 (1), 74.0933 (1)                                                                                                                    |
| Dodeca-2E,4Z,10Z-triene-8-ynoic acid isobutylamide              | 246.1856 | 15.8 | 57.0693 (100), 119.0866 (15), 145.1014 (12), 128.062 (8), 93.0697 (4), 74.1008 (2), 190.1167 (2), 173.0994 (1)                                                                                                                                   |
| Dodeca-2,4,10-triene-8-ynoic acid isobutylamide (isomer 1)      | 246.1849 | 18.2 | 57.0694 (100), 128.0610 (20), 145.1003 (9), 119.0842 (9), 93.0689 (4), 173.0964 (3), 74.0964 (3), 190.1222 (1),                                                                                                                                  |
| Dodeca-2E,4E,10Z-triene-8-ynoic acid isobutylamide              | 246.1849 | 19.0 | 57.0694 (100), 128.0612 (22), 145.1005 (12), 119.0849 (8), 93.0691 (5), 74.0958 (3), 173.0941 (1), 154.1244 (1), 190.1216 (0.4), 102.0913 (0.3)                                                                                                  |



|                                                            |          |      |                                                                                                                                                                                                                                                                                                             |
|------------------------------------------------------------|----------|------|-------------------------------------------------------------------------------------------------------------------------------------------------------------------------------------------------------------------------------------------------------------------------------------------------------------|
| Dodeca-2Z,4E,10Z-triene-8-ynoic acid isobutylamide         | 246.1845 | 19.4 | 57.0693 (100), 145.1005 (19), 119.0851 (16), 128.0617 (14), 173.0959 (4), 93.0692 (4), 74.0955 (2), 190.1211 (1)                                                                                                                                                                                            |
| Dodeca-2E,4E,10E-triene-8-ynoic acid isobutylamide         | 246.1850 | 20.1 | 57.0693 (48), 128.0601 (4), 119.0847 (3), 93.0701 (3), 190.1251 (1), 145.1013 (1), 74.0952 (1)                                                                                                                                                                                                              |
| Undeca-2E,4Z-diene-8,10-diynoic acid isobutylamide         | 230.1566 | 20.2 | 128.0616 (100), 57.0693 (80), 91.0535 (42), 116.0612 (28), 129.0682 (26), 103.0533 (7), 117.0645 (4), 174.0921 (1), 157.0649 (1), 102.0909 (1), 74.0961 (1), 188.1425 (0.1), 43.0527 (0.1)                                                                                                                  |
| Undeca-2Z,4E-diene-8,10-diynoic acid isobutylamide         | 230.1560 | 20.6 | 129.0691 (100), 128.0614 (88), 91.0536 (54), 174.0913 (14), 57.0694 (62), 157.0647 (17), 103.0533 (10), 117.0645 (8), 202.1223 (1), 102.0901 (1), 74.0959 (1), 43.0529 (0.2), 188.1054 (0.1)                                                                                                                |
| Dodeca-2E,4Z-diene-8,10-diynoic acid isobutylamide         | 244.1719 | 20.6 | 128.0616 (100), 57.0693 (57), 117.0692 (24), 91.0532 (22), 105.0691 (20), 143.0850 (12), 39.0220 (5), 188.1074 (2), 171.0802 (2), 43.0535 (2), 102.0910 (1), 74.0966 (1), 216.1396 (0.2), 142.1233 (0), 202.1253 (0)                                                                                        |
| Undeca-2E,4E-diene-8,10-diynoic acid isobutylamide         | 230.1535 | 20.8 | 57.0696 (100), 128.0618 (72), 91.0543 (45), 116.0617 (21), 129.0684 (20), 103.0540 (7), 117.0614 (3), 174.0904 (1), 157.0660 (1), 74.0966 (1), 102.0921 (0.4), 43.0535 (0.3), 202.1225 (0.2)                                                                                                                |
| Dodeca-2E-ene-8,10-diynoic acid isobutylamide              | 246.1848 | 20.9 | 57.0692 (65), 67.0534 (39), 105.0691 (39), 91.0533 (35), 41.0378 (33), 79.0531 (28), 77.0376 (19), 145.1007 (7), 81.0687 (4), 173.0944 (1), 74.0959 (1), 190.1224 (0.3), 102.0903 (0.4)                                                                                                                     |
| Trideca-2E,7Z-diene-10,12-diynoic acid isobutylamide       | 258.1886 | 21.0 | 117.0693 (100), 128.0614 (95), 43.0537 (57), 131.0822 (8), 103.0533 (8), 57.0693 (5), 230.1542 (2), 157.0999 (1), 142.1220 (1), 74.0962 (1), 202.1230 (0.4), 185.0950 (0.2), 216.1385 (0.1), 156.1356 (0.1)                                                                                                 |
| Dodeca-2,4-diene-8,10-diynoic acid 2-methylbutylamide      | 258.1886 | 21.0 | 117.0693 (100), 143.0851 (77), 71.0852 (60), 105.0691 (42), 188.1068 (24), 171.0801 (24), 91.0536 (22), 57.0699 (5), 230.1542 (2), 88.1116 (2), 142.1220 (1), 116.1062 (1), 202.1230 (0.4), 168.1360 (0.3), 156.1356 (0.1), 29.0383 (0)                                                                     |
| <i>Dodeca-2Z,4Z,10Z-triene-8-ynoic acid isobutylamide*</i> | 246.1850 | 21.1 | 57.0692 (100), 128.0613 (67), 145.1008 (21), 119.0847 (13), 173.0958 (4), 93.0688 (4), 74.0962 (2), 190.1218 (1), 154.1216 (0.3), 102.0900 (0.3)                                                                                                                                                            |
| Dodeca-2E,4E,8Z,10E/Z-tetraenoic acid isobutylamide        | 248.2036 | 21.2 | 57.0695 (100), 67.0537 (93), 152.1072 (84), 68.0614 (76), 81.0688 (45), 79.0530 (37), 41.0377 (34), 66.0454 (32), 167.1310 (25), 100.0755 (9), 55.0533 (6), 168.1346 (3), 102.0911 (3), 81.0324 (2), 147.1174 (1), 128.1070 (1), 121.1003 (1), 109.1011 (1), 175.1122 (0.4), 142.1222 (0.3), 192.1383 (0.2) |
| Trideca-2E,7Z-diene-10,12-diynoic acid 2-methylbutylamide  | 272.1998 | 21.1 | 71.0852 (22), 157.1000 (2), 202.1211 (1), 185.0960 (1), 88.1101 (0.4), 116.1055 (0.1)                                                                                                                                                                                                                       |

|                                                                                                                     |          |      |                                                                                                                                                                                                                                                                  |
|---------------------------------------------------------------------------------------------------------------------|----------|------|------------------------------------------------------------------------------------------------------------------------------------------------------------------------------------------------------------------------------------------------------------------|
| Dodeca-2E,4Z,10E-triene-8-ynoic acid 2-methylbutylamide<br>OR<br>Dodeca-2E-ene-8,10-diynoic acid 2-methylbutylamide | 260.2005 | 21.2 | 71.0856 (48), 145.1011 (18), 131.0850 (18), 119.0852 (17), 57.0696 (3), 173.0960 (2), 190.1225 (1), 116.1080 (1), 88.1121 (1), 232.2059 (0.3)                                                                                                                    |
| Pentadeca-2E,9Z-diene-12,14-diynoic acid isobutylamide                                                              | 286.2154 | 21.4 | 57.0695 (85), 74.0962 (2), 230.1546 (1), 185.1326 (1), 213.1272 (0.3), 102.0924 (0.1)                                                                                                                                                                            |
| Dodeca-2E,4E,8Z-trienoic acid isobutylamide                                                                         | 250.2179 | 21.5 | 57.0694 (100), 168.1351 (3), 102.0908 (3), 83.0848 (3), 154.1221 (2), 74.0960 (2), 194.1546 (1), 177.1277 (1), 149.1330 (1), 97.1008 (0.2)                                                                                                                       |
| Dodeca-2E,4E,8Z,10E/Z-tetraenoic acid 2-methylbutylamide                                                            | 262.2171 | 21.5 | 71.0855 (100), 116.1071 (3), 175.1113 (1), 147.1176 (1), 88.1118 (1), 192.1395 (0.3)                                                                                                                                                                             |
| Trideca-2Z,7Z-diene-10,12-diynoic acid 2-methylbutylamide                                                           | 272.1997 | 21.5 | 116.0610 (8), 157.0644 (4), 202.1258 (0.5), 71.0873 (0.4), 185.0925 (0.3)                                                                                                                                                                                        |
| Hexadeca-2E,9Z-diene-12,14-diynoic acid isobutylamide                                                               | 300.2310 | 21.6 | 57.0695 (58), 74.0962 (5), 199.1484 (3), 227.1580 (1), 102.0417 (1)                                                                                                                                                                                              |
| Dodeca-2E,4E,8Z-trienoic acid isobutylamide (isómer 2)                                                              | 250.2160 | 21.8 | 57.0696 (100), 83.0852 (2), 74.0964 (2), 194.1545 (1), 177.1274 (1), 168.1356 (1), 154.1225 (1), 102.0906 (1), 149.1323 (0.3)                                                                                                                                    |
| Dodeca-2E,4E-dienoic acid isobutylamide                                                                             | 252.2360 | 21.9 | 57.0695 (100), 55.0538 (87), 81.0328 (76), 67.0538 (56), 69.0697 (53), 81.0695 (44), 95.0856 (31), 196.1704 (19), 43.0537 (15), 154.1234 (7), 179.1443 (3), 74.0971 (3), 168.1388 (2), 151.1486 (2), 85.1013 (1), 210.1854 (0.3), 116.1085 (0.2), 102.0907 (0.2) |

<sup>1</sup> The MS<sup>2</sup> data were obtained from the fragmentation of the [M + H]<sup>+</sup> precursor ion of phenolic/acid compounds. Relative intensities of product ions are in parentheses.

<sup>2</sup> This compound was not found in literature.

E/Z stereochemistry is indicated here in accordance with literature [1–7], but it should be highlighted that without conformational NMR spectra, it is not possible to conclusively distinguish between E and Z isomers.

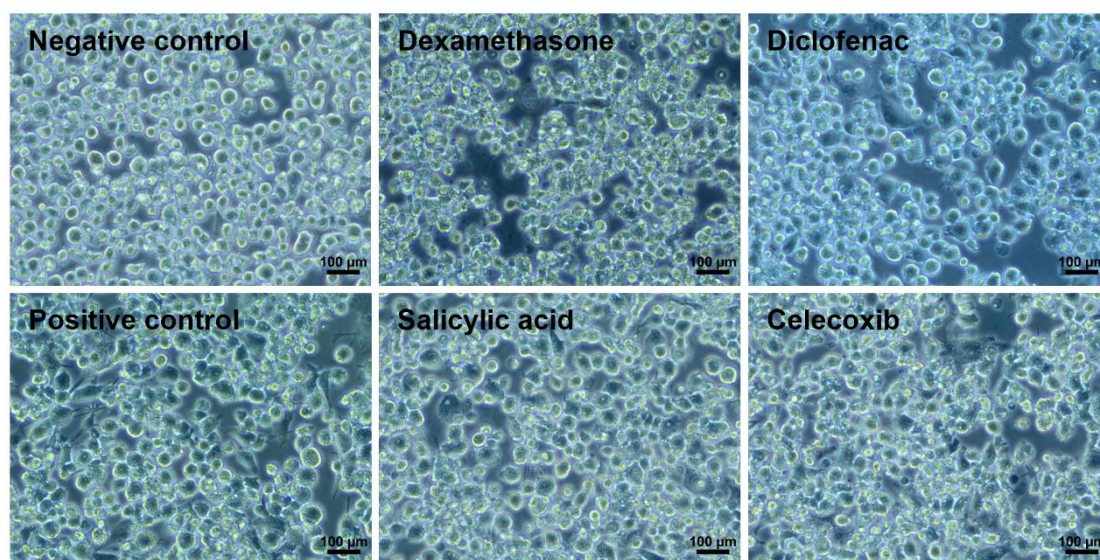

**Figure S1.** Optical micrographs of non-stimulated macrophages (negative control), LPS-stimulated macrophages (positive control) and LPS-stimulated macrophages cultured in the presence of clinically used anti-inflammatory drugs (dexamethasone, diclofenac, salicylic acid and celecoxib, 10  $\mu$ M) cultured for 24 h. Scale bar = 100  $\mu$ m.



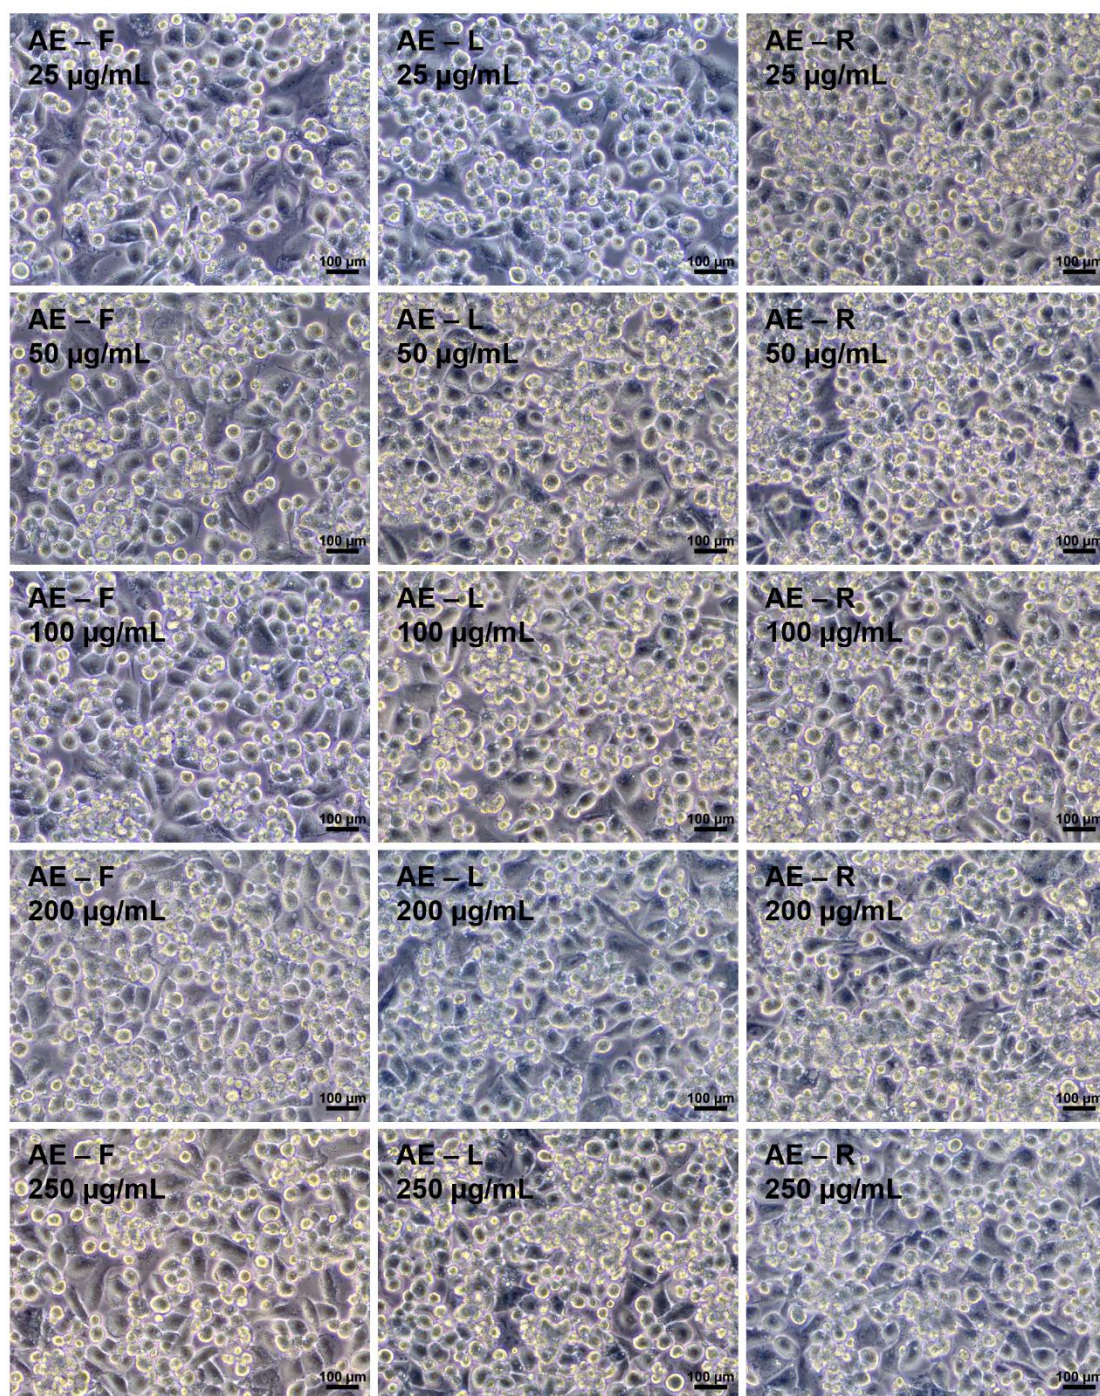

**Figure S2.** Optical micrographs of non-stimulated macrophages cultured in the presence of aqueous extracts (AE; 25 - 250 µg/mL) obtained from *E. purpurea* flowers (F), leaves (L), and roots (R) cultured for 24 h. Scale bar = 100 µm.



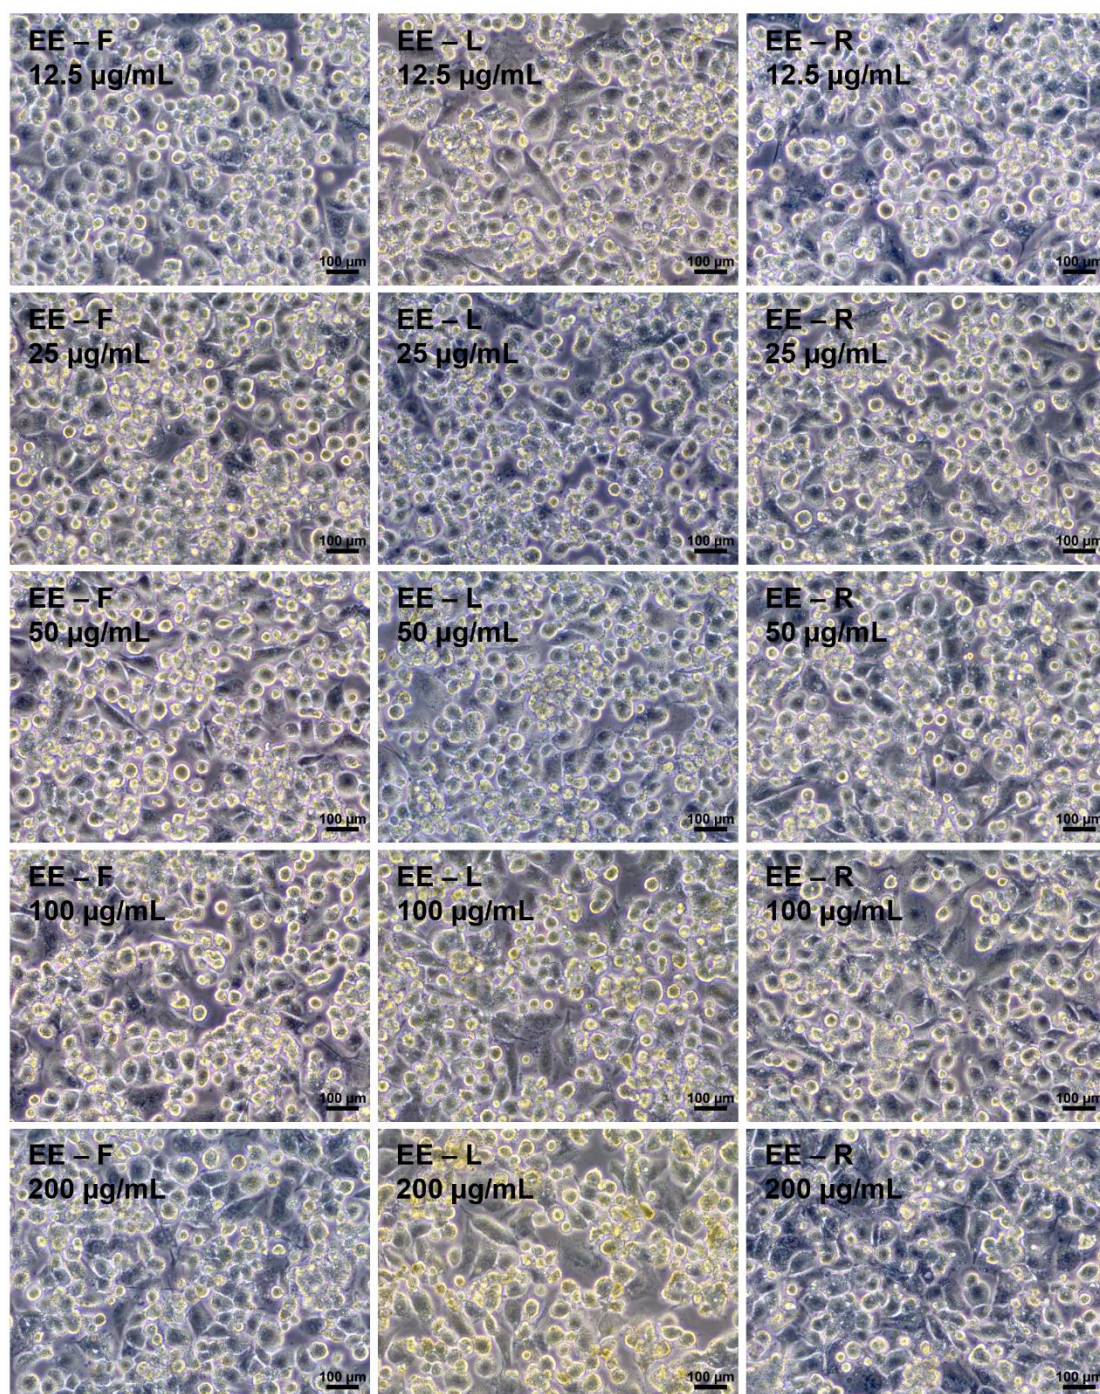

**Figure S3.** Optical micrographs of non-stimulated macrophages cultured in the presence of ethanolic extracts (EE; 12.5 - 200 µg/mL) obtained from *E. purpurea* flowers (F), leaves (L), and roots (R) cultured for 24 h. Scale bar = 100 µm.



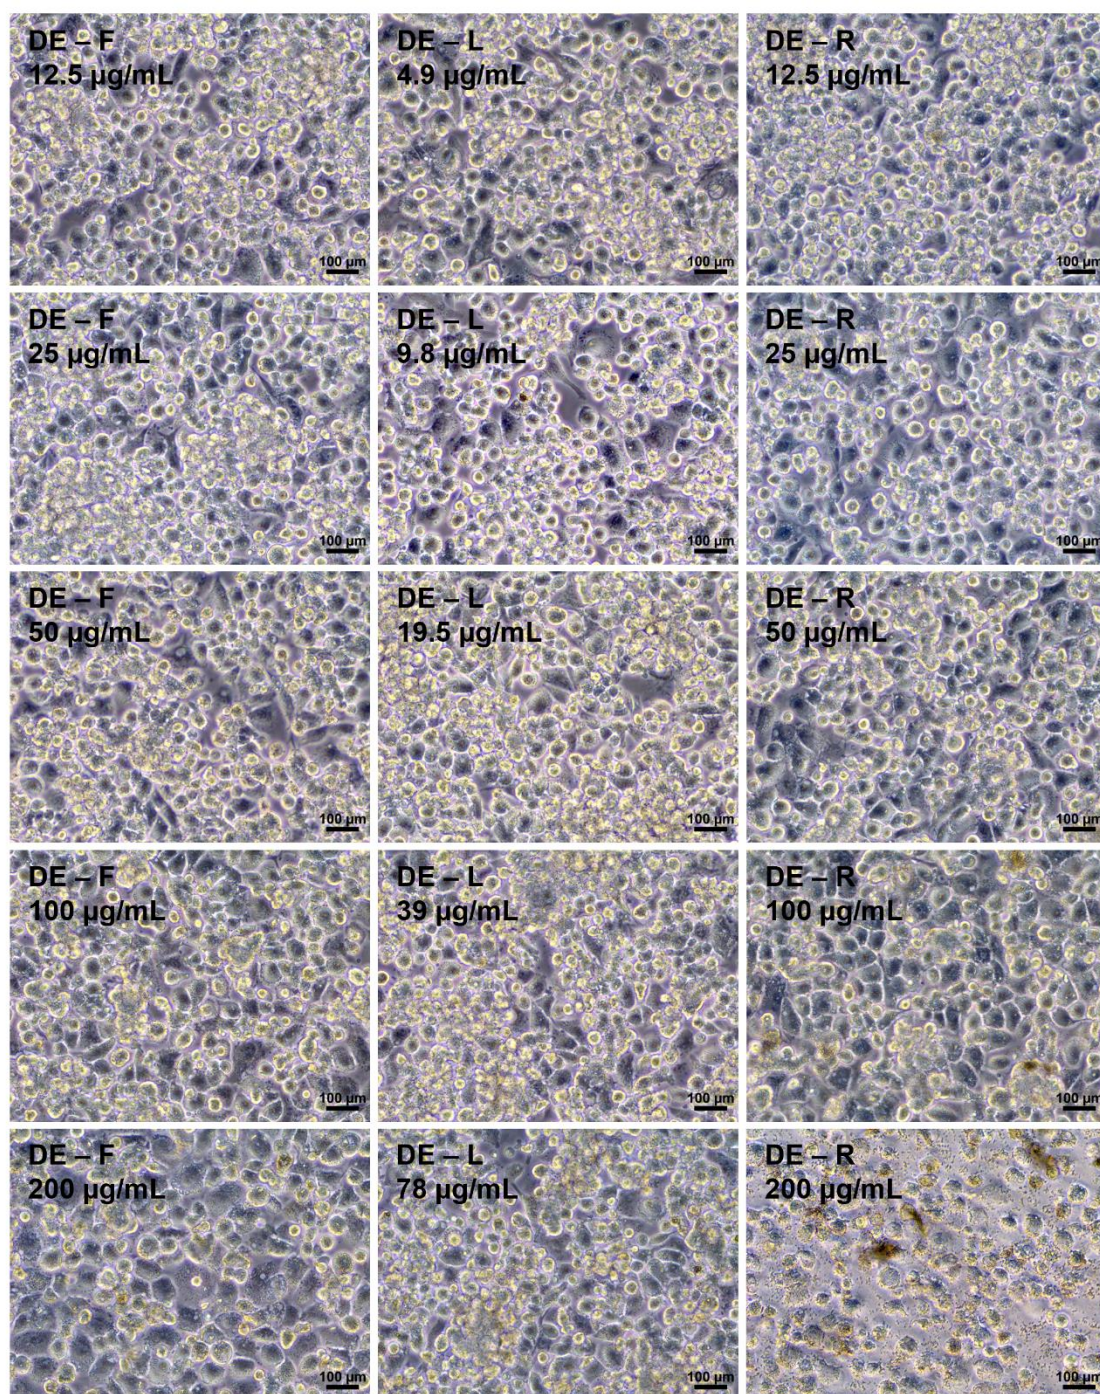

**Figure S4.** Optical micrographs of non-stimulated macrophages cultured in the presence of dichloromethanolic extracts (DE; 12.5 - 200 µg/mL) obtained from *E. purpurea* flowers (F), leaves (L), and roots (R) cultured for 24 h. Scale bar = 100 µm.



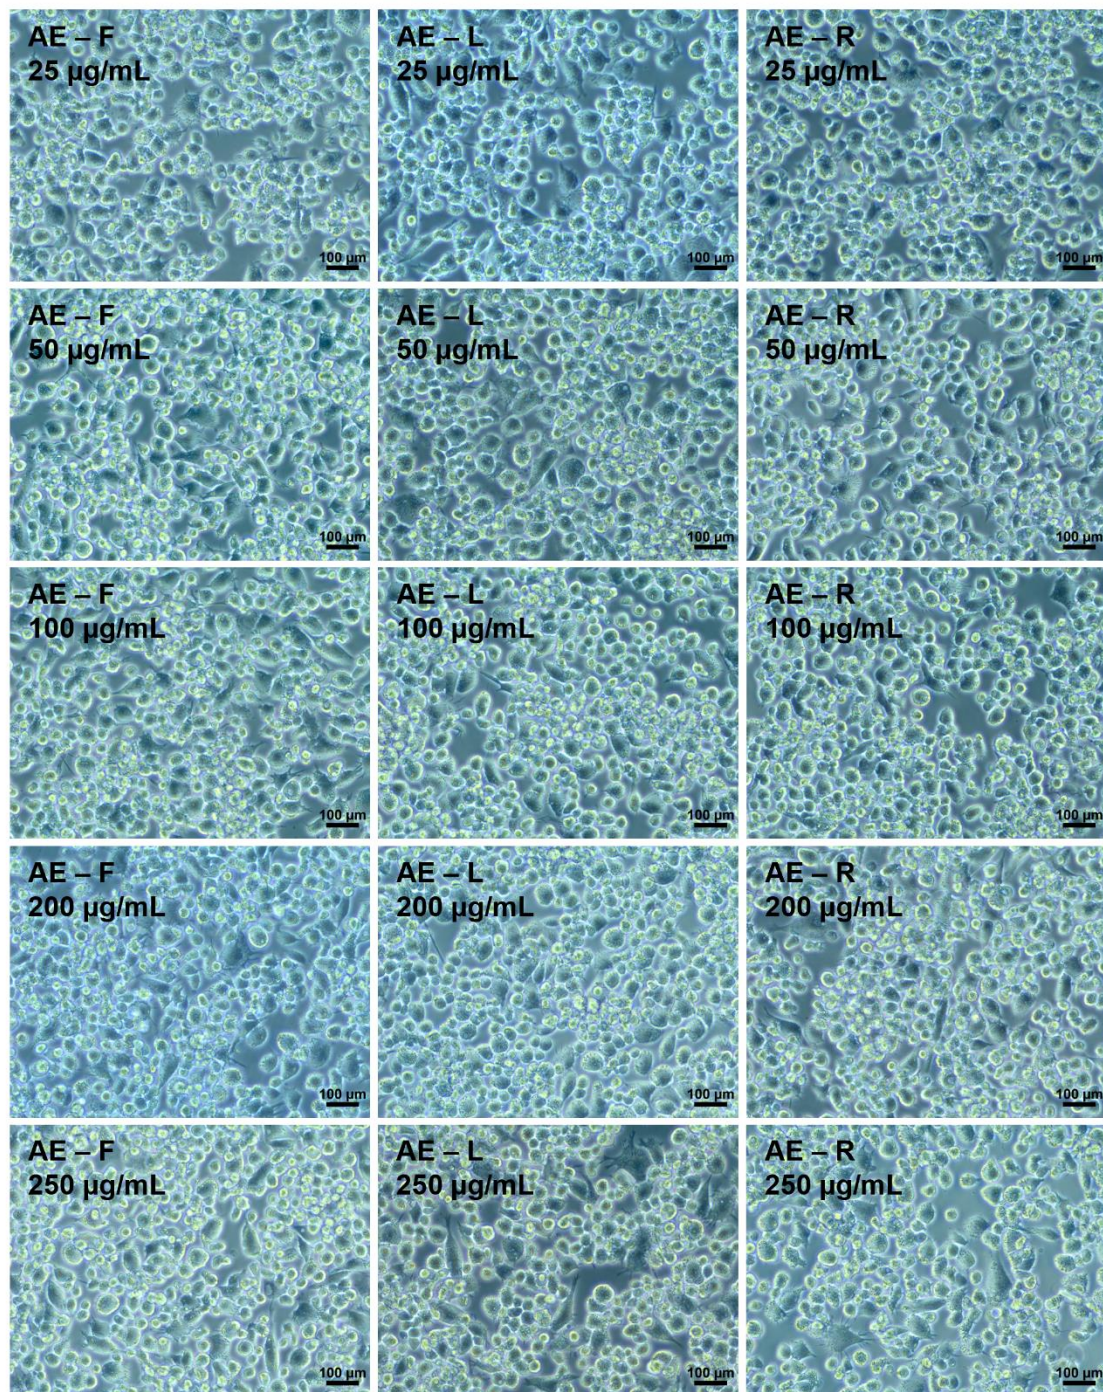

**Figure S5.** Optical micrographs of LPS-stimulated macrophages cultured in the presence of aqueous extracts (AE; 25 - 250 µg/mL) obtained from *E. purpurea* flowers (F), leaves (L), and roots (R) cultured for 24 h. Scale bar = 100 µm.



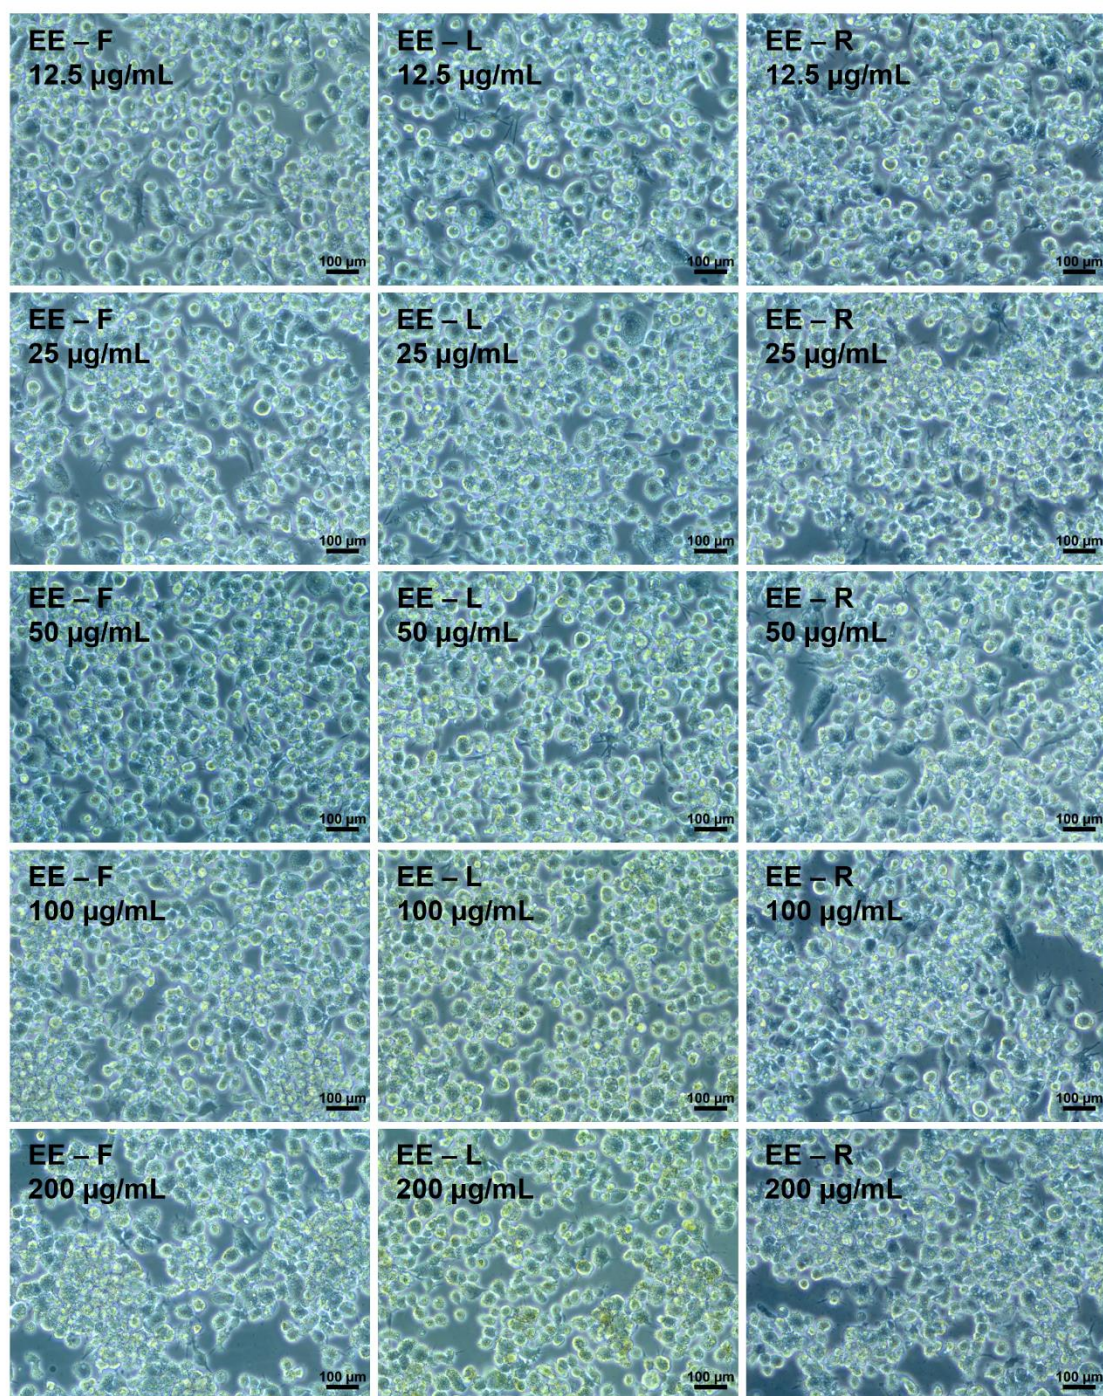

**Figure S6.** Optical micrographs of LPS-stimulated macrophages cultured in the presence of ethanolic extracts (EE; 12.5 - 200 µg/mL) obtained from *E. purpurea* flowers (F), leaves (L), and roots (R) cultured for 24 h. Scale bar = 100 µm.



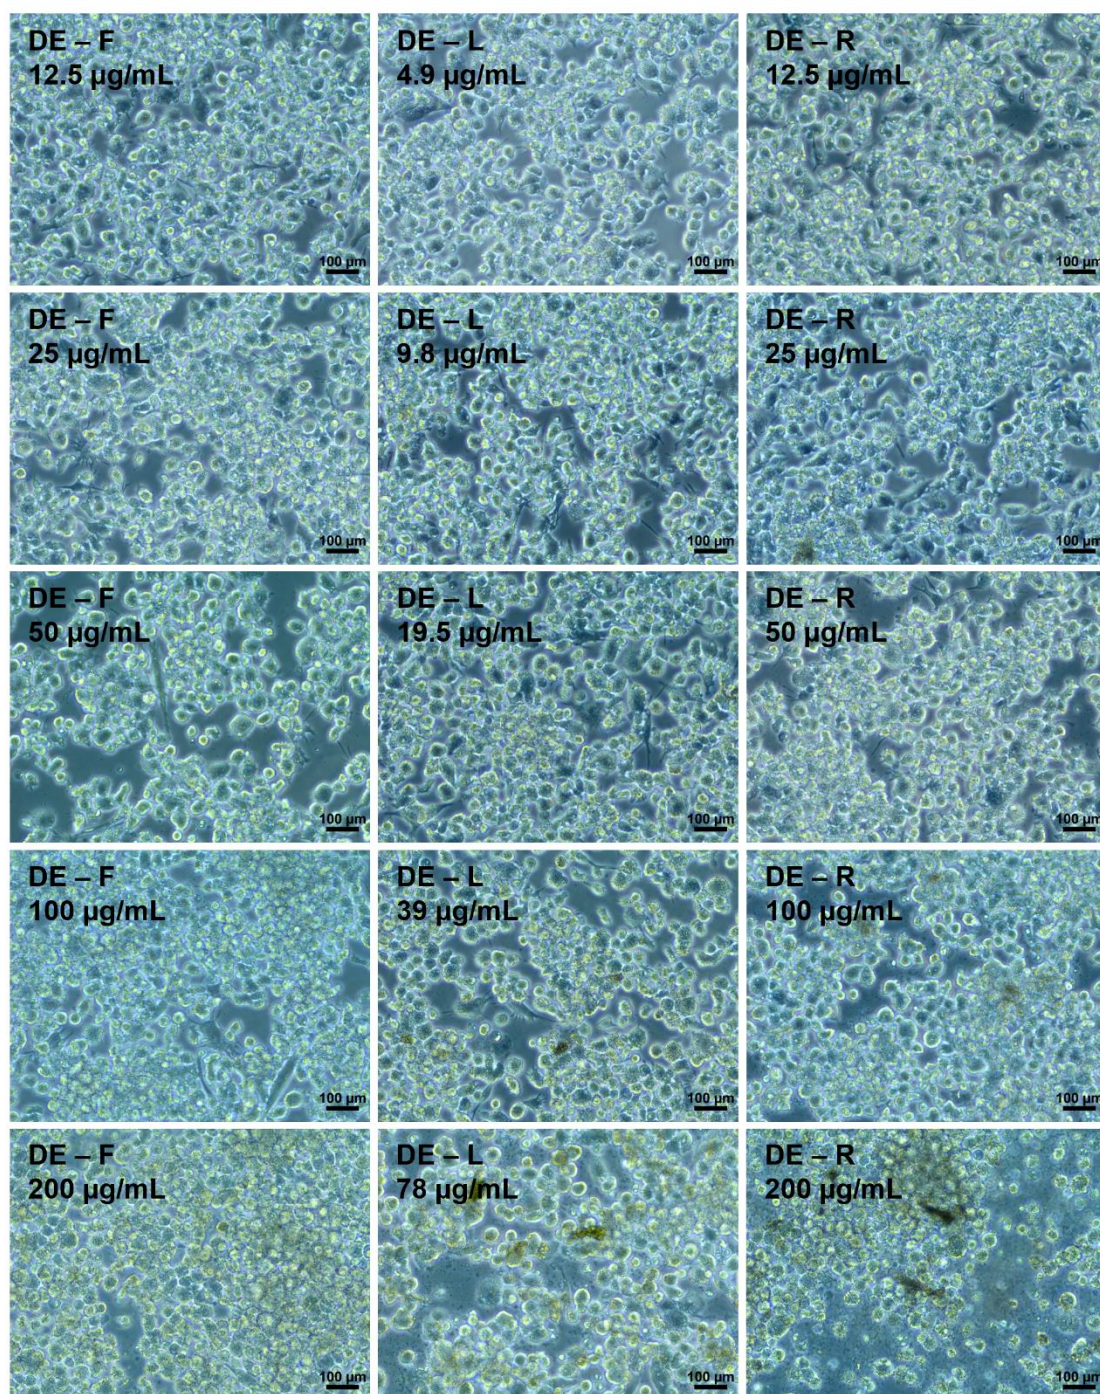

**Figure S7.** Optical micrographs of LPS-stimulated macrophages cultured in the presence of dichloromethanolic extracts (DE; 4.9 - 200 µg/mL) obtained from *E. purpurea* flowers (F), leaves (L), and roots (R) cultured for 24 h. Scale bar = 100 µm.

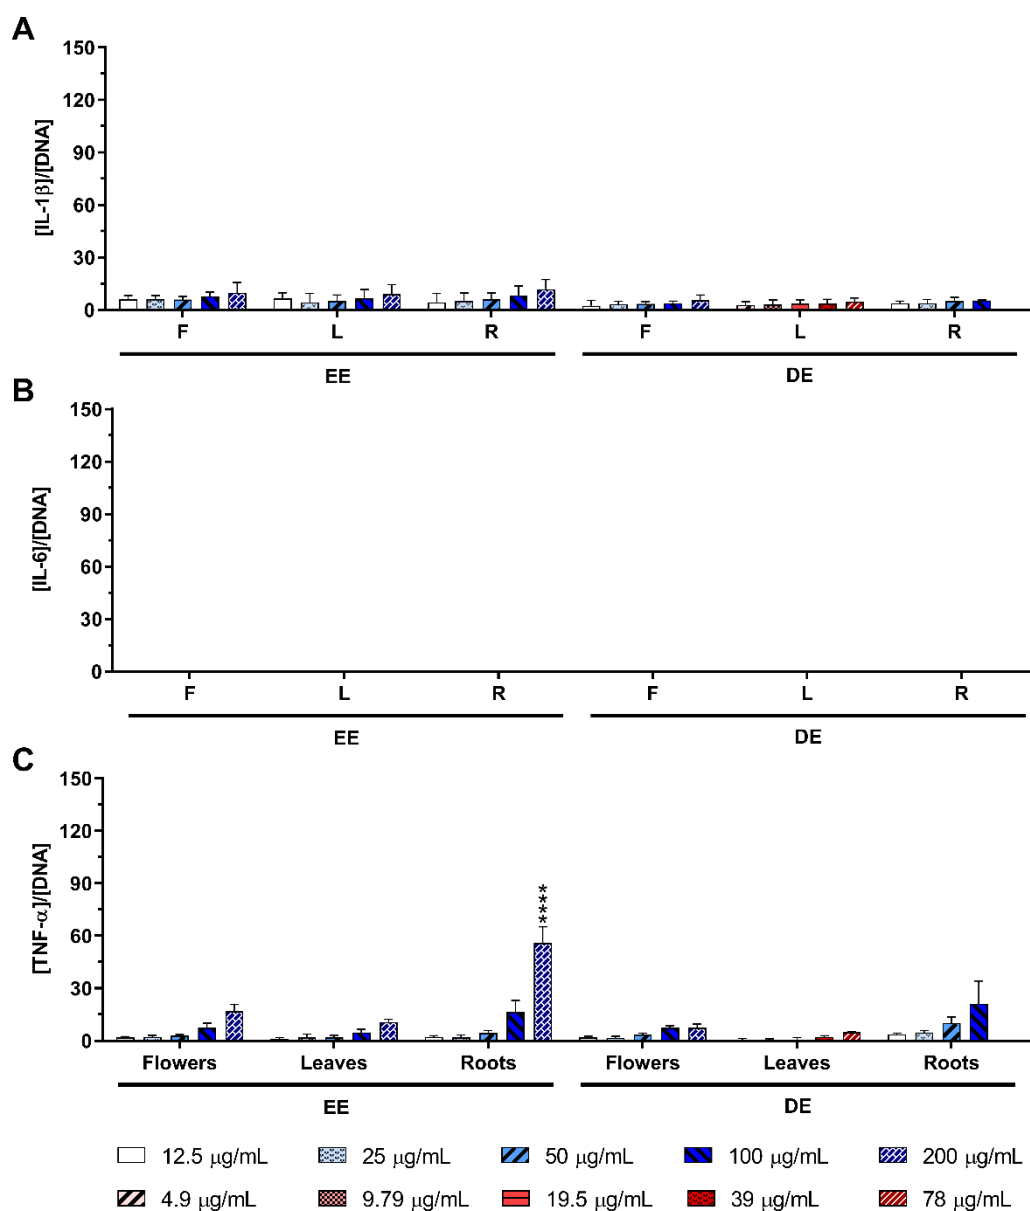

**Figure S8.** IL-1 $\beta$  (A), IL-6 (B), and TNF- $\alpha$  (C) production by non-stimulated macrophages cultured in the presence of different concentrations of the ethanolic (EE) and dichloromethanolic extract (DE) obtained from *E. purpurea* flowers (F), leaves (L), and roots (R) cultured for 24 h. Statistically significant differences are \*\* ( $p < 0.0075$ ), \*\*\* ( $p < 0.0006$ ), and \*\*\*\* ( $p < 0.0001$ ) in comparison to the negative control (non-stimulated macrophages without treatment) for each different tested extract.



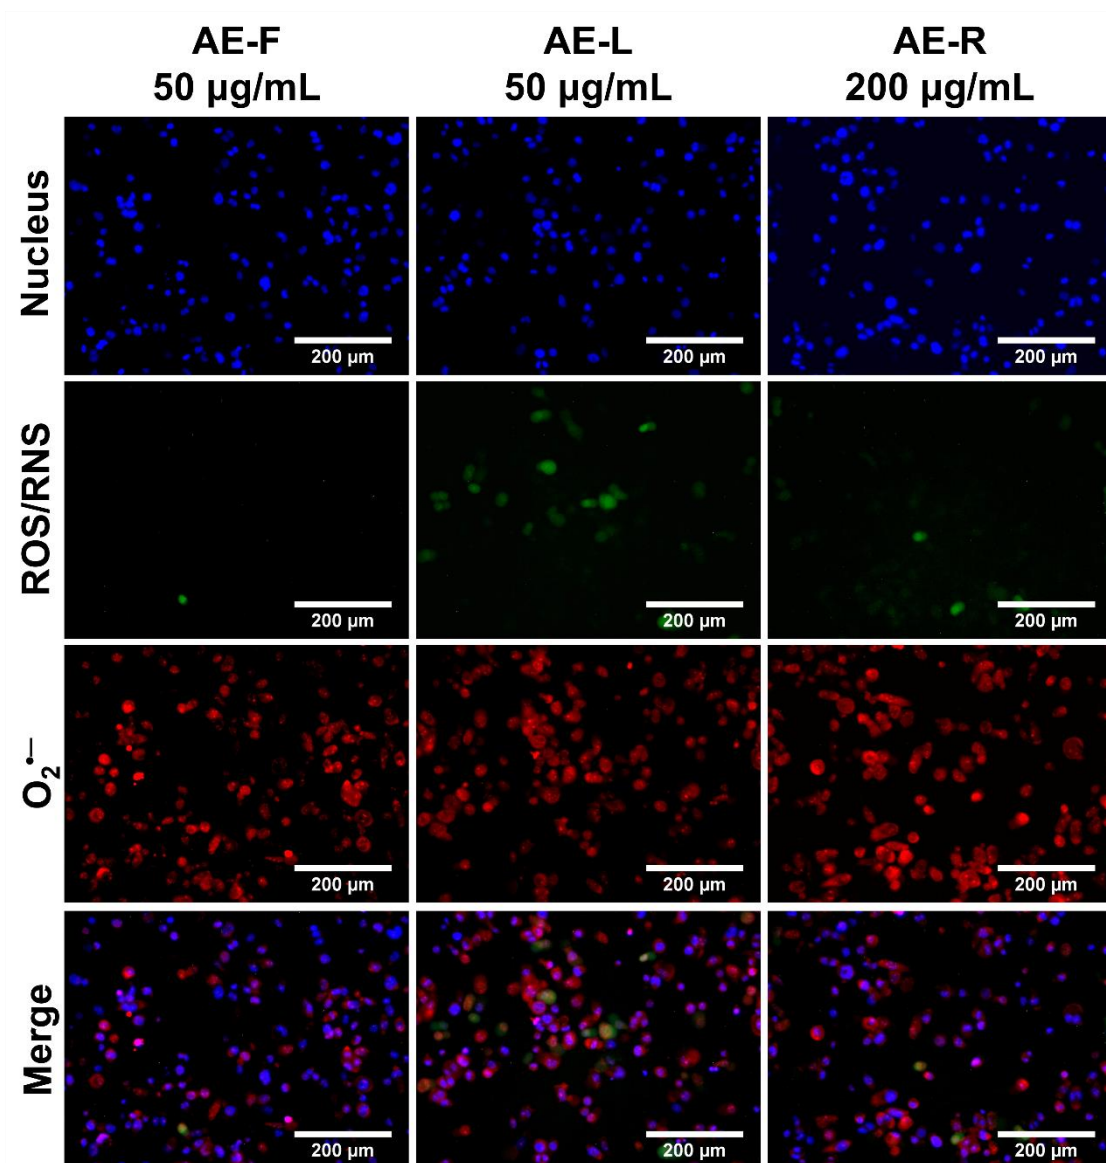

**Figure S9.** Intracellular ROS/RNS (green) and O<sub>2</sub><sup>•-</sup> (red) production by non-stimulated macrophages (nucleus in blue) in the presence of aqueous extracts (AE; 50 or 200 µg/mL) obtained from flowers (F), leaves (L), and roots (R) of *E. purpurea* cultured for 24 h. Scale bar = 200 µm.

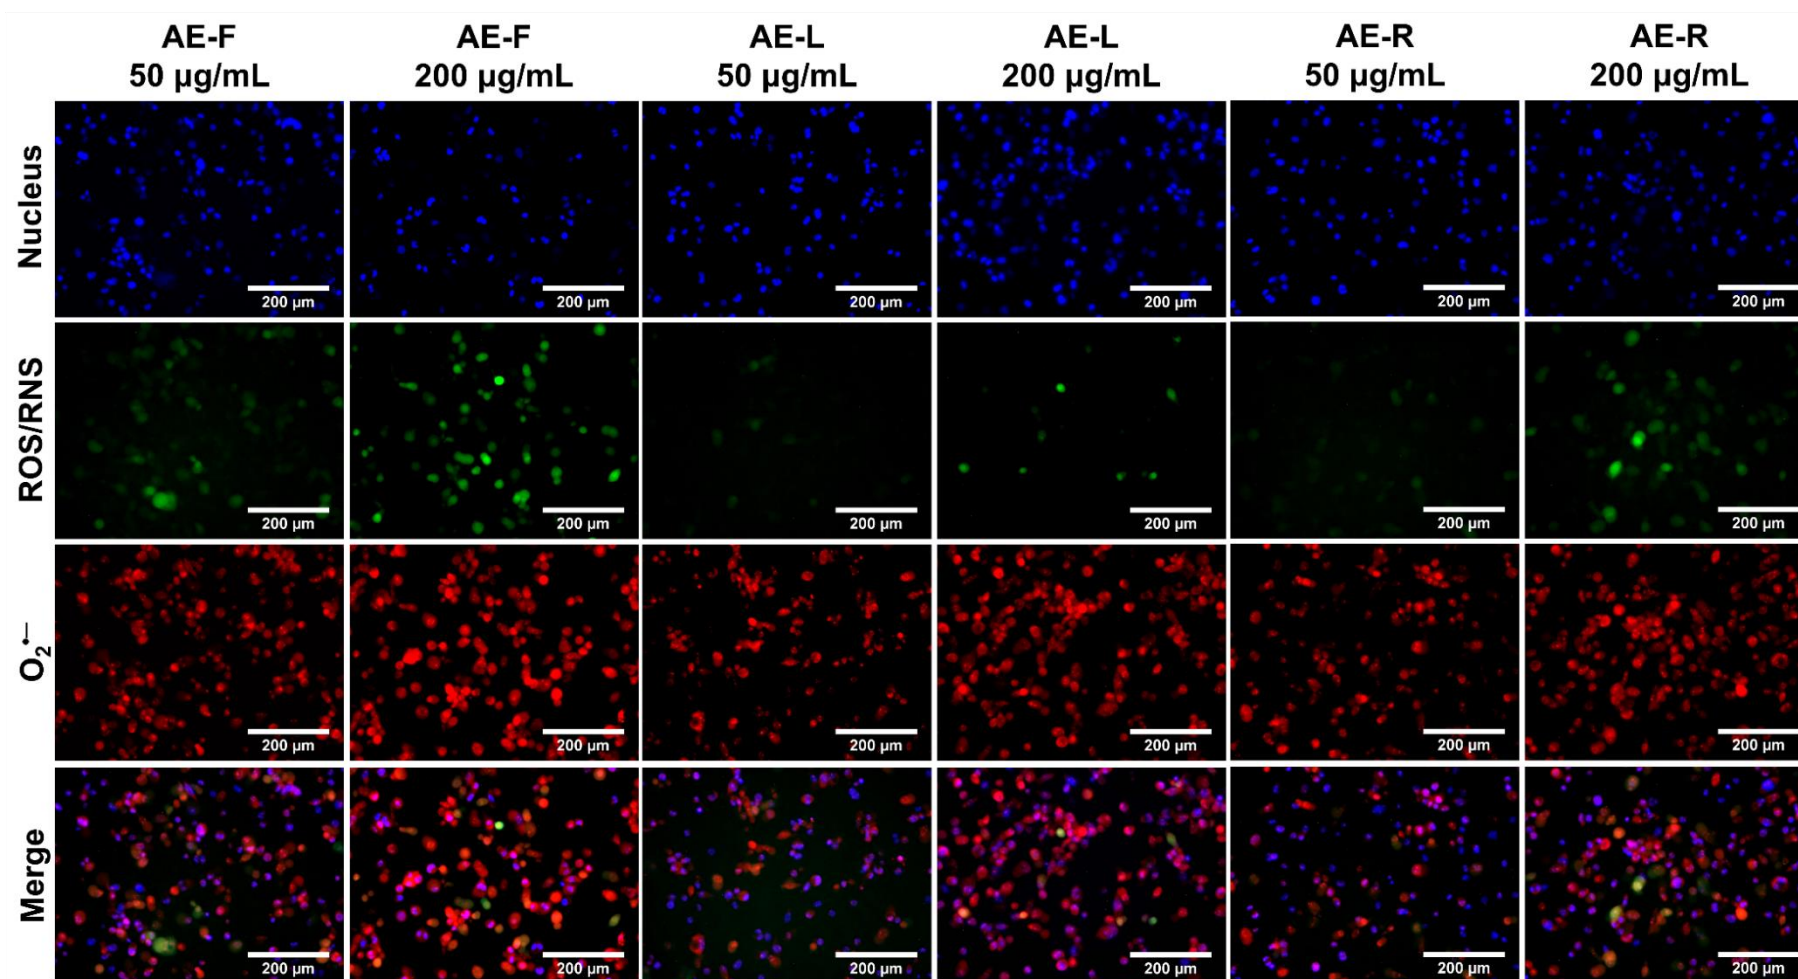

**Figure S10.** Intracellular ROS/RNS (green) and  $O_2^{\bullet-}$  (red) production by LPS-stimulated macrophages in presence of aqueous extracts (AE; 50 and 200 µg/mL) obtained from flowers (F), leaves (L), and roots (R) of *E. purpurea* cultured for 24 h. Scale bar = 200 µm.

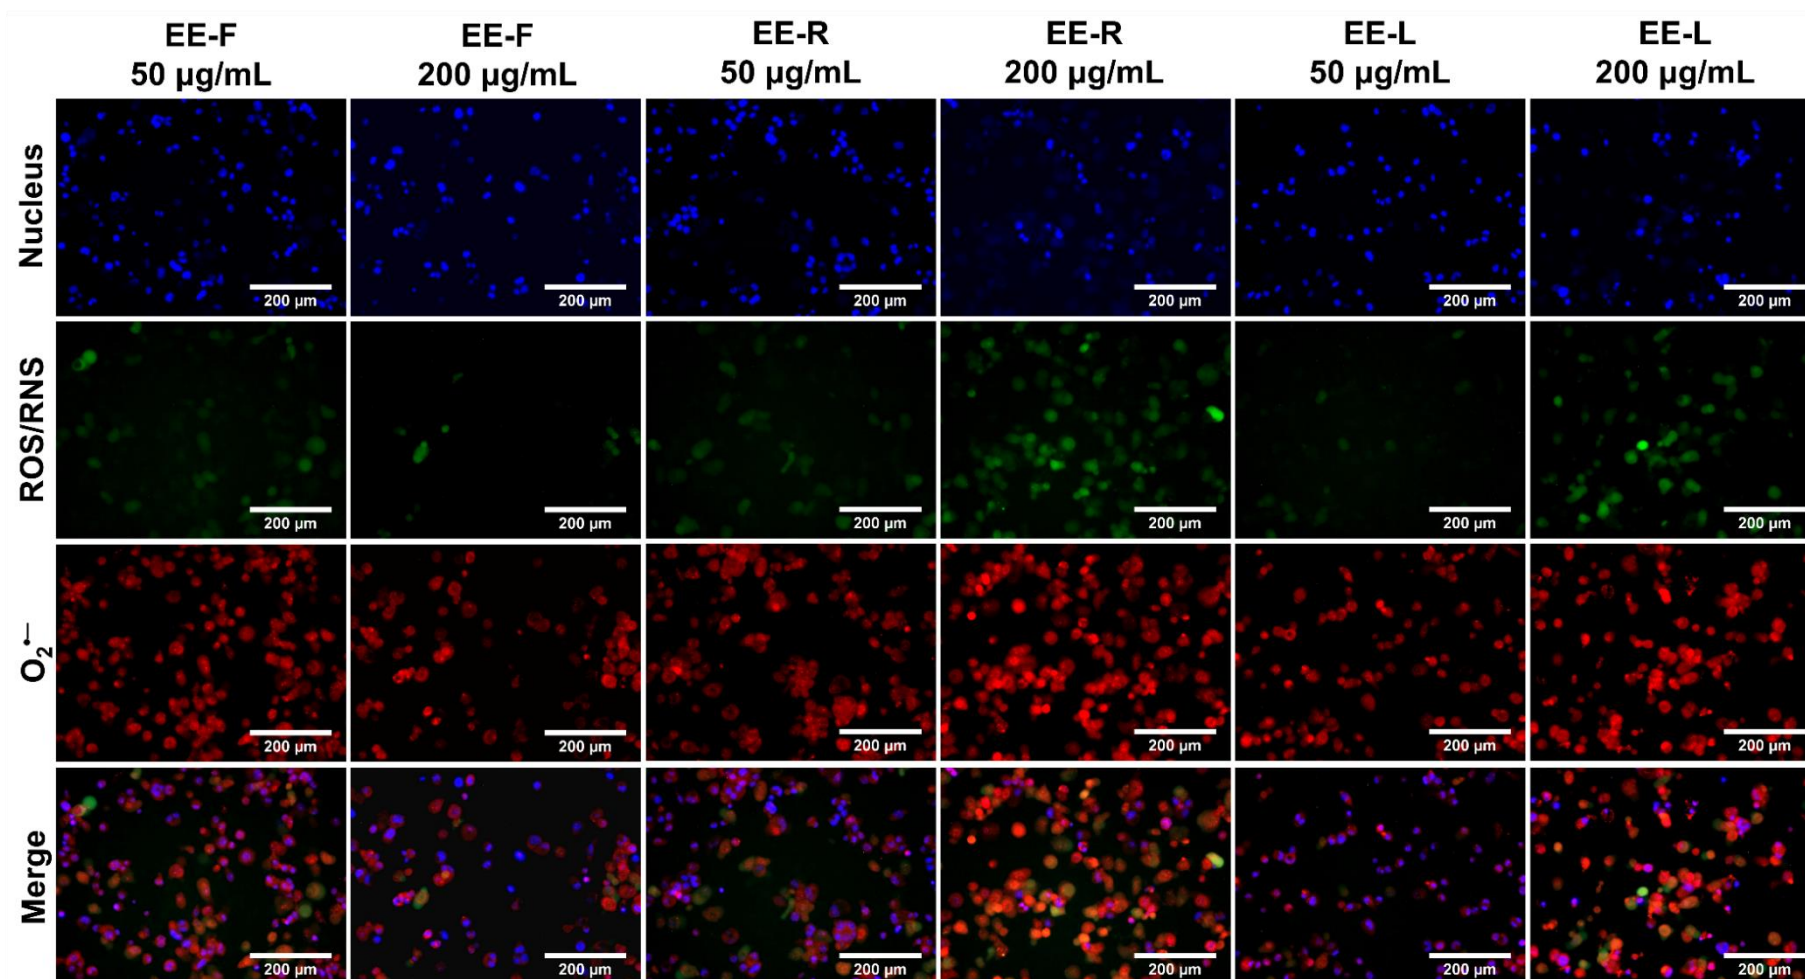

**Figure S11.** Intracellular ROS/RNS (green) and  $O_2^{\bullet-}$  (red) production by LPS-stimulated macrophages in presence of ethanolic extracts (EE; 50 and 200  $\mu\text{g/mL}$ ) obtained from flowers (F), leaves (L), and roots (R) of *E. purpurea* cultured for 24 h. Scale bar = 200  $\mu\text{m}$ .



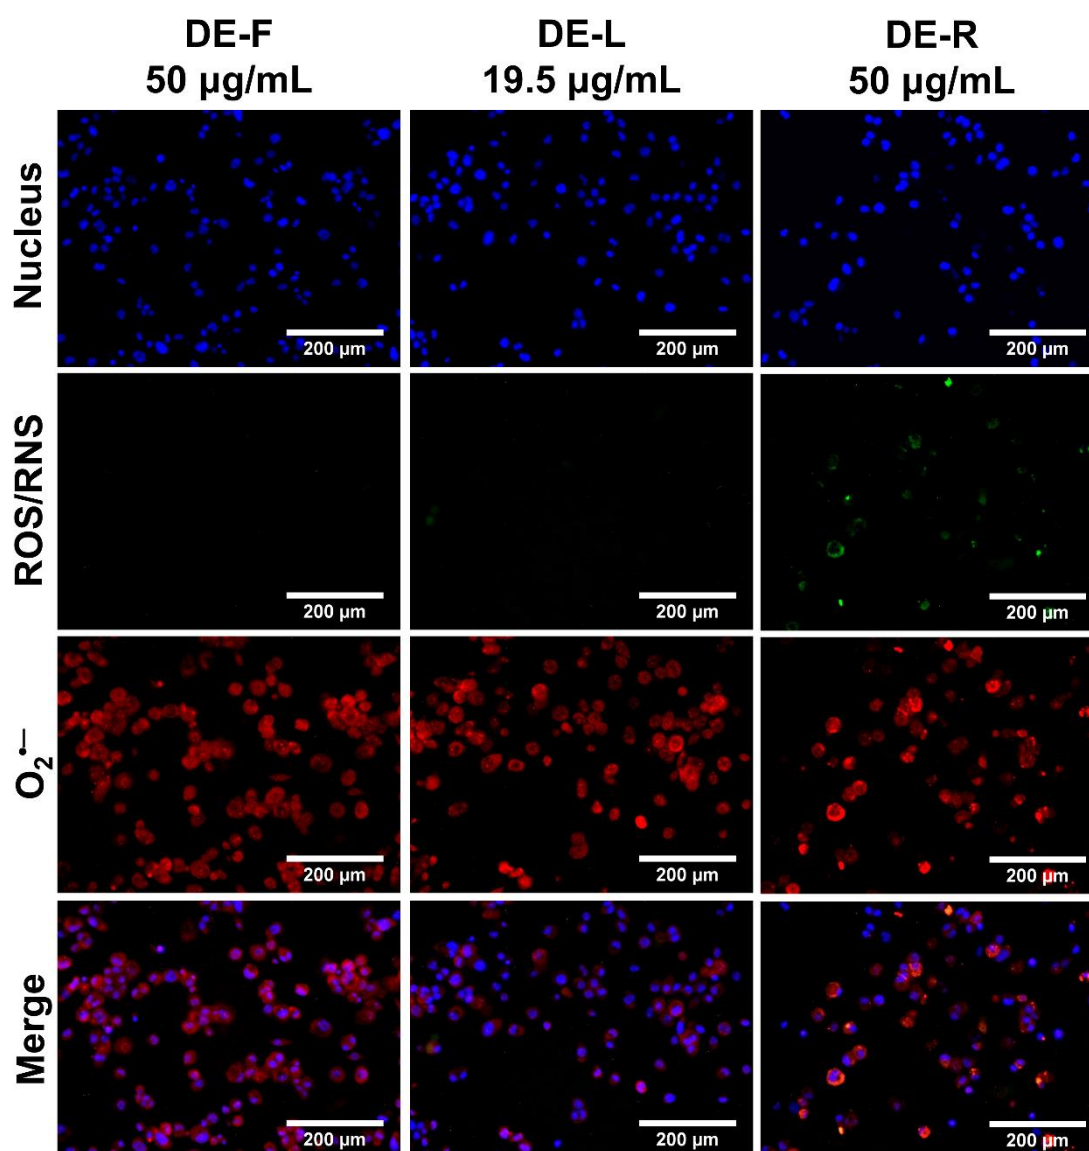

**Figure S12.** Intracellular ROS/RNS (green) and  $O_2^{\bullet-}$  (red) production by LPS-stimulated macrophages in presence of dichloromethanolic extracts (DE; 50 and 200  $\mu\text{g/mL}$ ) obtained from flowers (F), leaves (L), and roots (R) of *E. purpurea* cultured for 24 h. Scale bar = 200  $\mu\text{m}$ .

## References

1. Cech, N.B.; Eleazer, M.S.; Shoffner, L.T.; Crosswhite, M.R.; Davis, A.C.; Mortenson, A.M. High performance liquid chromatography/electrospray ionization mass spectrometry for simultaneous analysis of alkamides and caffeic acid derivatives from *Echinacea purpurea* extracts. *J. Chromatogr. A* 2006, 1103, 219–228, doi:https://doi.org/10.1016/j.chroma.2005.11.008.
2. Spelman, K.; Wetschler, M.H.; Cech, N.B. Comparison of alkylamide yield in ethanolic extracts prepared from fresh versus dry *Echinacea purpurea* utilizing HPLC–ESI–MS. *J. Pharm. Biomed. Anal.* 2009, 49, 1141–1149, doi:https://doi.org/10.1016/j.jpba.2009.02.011.
3. Pellati, F.; Epifano, F.; Contaldo, N.; Orlandini, G.; Cavicchi, L.; Genovese, S.; Bertelli, D.; Benvenuti, S.; Curini, M.; Bertaccini, A.; et al. Chromatographic Methods for Metabolite Profiling of Virus- and Phytoplasma-Infected Plants of *Echinacea purpurea*. *J. Agric. Food Chem.* 2011, 59, 10425–10434, doi:10.1021/jf2025677.
4. Thomsen, M.O.; Fretté, X.C.; Christensen, K.B.; Christensen, L.P.; Grevsen, K. Seasonal Variations in the Concentrations of Lipophilic Compounds and Phenolic Acids in the Roots of *Echinacea purpurea* and *Echinacea pallida*. *J. Agric. Food Chem.* 2012, 60, 12131–12141, doi:10.1021/jf303292t.
5. He, X.; Lin, L.; Bernart, M.W.; Lian, L. Analysis of alkamides in roots and achenes of *Echinacea purpurea* by liquid chromatography–electrospray mass spectrometry. *J. Chromatogr. A* 1998, 815, 205–211, doi:https://doi.org/10.1016/S0021-9673(98)00447-6.

6. Mudge, E.; Lopes-Lutz, D.; Brown, P.; Schieber, A. Analysis of alkylamides in Echinacea plant materials and dietary supplements by ultrafast liquid chromatography with diode array and mass spectrometric detection. *J. Agric. Food Chem.* 2011, 59, 8086–8094, doi:10.1021/jf201158k.
7. Bauer, R.; Remiger, P. TLC and HPLC Analysis of Alkamides in Echinacea Drugs<sup>1,2</sup>. *Planta Med.* 1989, 55, 367–371, doi:10.1055/s-2006-962030.
